# Supplementary material for: Synthesis of unsymmetrical phenylurea derivatives via oxidative cross coupling of aryl formamides with amines under metal-free conditions
Source: Royal Society of Chemistry journal article supplement (doi:10.1039/c4nj01668h), 2014-11-19

## Electronic Supplemental Information (ESI)

### Synthesis of unsymmetrical phenylurea derivatives *via* oxidative cross coupling of aryl formamides with amines under metal free conditions†

Nagireddy Veera Reddy, Paila Santhosh Kumar, Peddi Sudhir Reddy, Mannepalli Lakshmi Kantam and Kallu Rajender Reddy\*

*Inorganic and Physical Chemistry Division, CSIR-Indian Institute of Chemical Technology, Tarnaka, Hyderabad – 500 607, India.*

*e-mail:* [rajender@iict.res.in](mailto:rajender@iict.res.in); [rajenderkallu@yahoo.com](mailto:rajenderkallu@yahoo.com)

#### Table of contents

|                                                                                |   |
|--------------------------------------------------------------------------------|---|
| 1. General information.....                                                    | 2 |
| 2. Experimental section.....                                                   | 2 |
| 3. Spectroscopic data of products.....                                         | 3 |
| 4. Copies of <sup>1</sup> H NMR, <sup>13</sup> C NMR spectra for products..... | 7 |

## 1. General Information :

All chemicals were purchased from Sigma-Aldrich and S.D Fine Chemicals, Pvt. Ltd. India and used as received. ACME silica gel (100–200 mesh) was used for column chromatography and thin-layer chromatography was performed on Merck-pre-coated silica gel 60-F<sub>254</sub> plates and visualized by UV-light and developed by Iodine. All the other chemicals and solvents were obtained from commercial sources and purified using standard methods. All <sup>1</sup>H, <sup>13</sup>C NMR spectra were recorded on a Avance-300, Inova-400, Inova-500 MHz Spectrometer. Chemical shifts ( $\delta$ ) are reported in ppm, using TMS ( $\delta = 0$ ) as an internal standard in CDCl<sub>3</sub>. The peak patterns are indicated as follows: s, singlet; d, doublet; t, triplet; q, quintet; dd, doublet of doublet; dt, doublet of triplet. The coupling constants (*J*), are reported in Hertz (Hz). The IR values are reported in reciprocal centimeters (cm<sup>-1</sup>) using Bruker Alpha FT-IR spectrometer. Mass was recorded on Thermo Trace DSQ GC-MS spectrometer using BP-01 (30M x 0.25 mm x 1 $\mu$ m) column. Mass spectral data were compiled using MS (ESI), HRMS mass spectrometers.

## 2. Expérimental Section :

General procedure:

In a reaction vessel 1 mmol of formamide (N-formyl aniline derivative) was dissolved in 3 mL of dichloroethane solvent and slowly added the [bis(trifluoroacetoxy)iodo]benzene (Oxidant, 1mmol) to the solution with stirring over a period of 2 minutes. Then 2 mmol of amine was added to the above reaction mixture and stirred at room temperature for two hours under inert atmosphere in presence of molecular sieves.

After completion of reaction time, solvent was removed under reduced pressure or directly proceeded for the conventional work up with ethyl acetate, water mixture. The organic layer was separated and dried over anhydrous Na<sub>2</sub>SO<sub>4</sub>. Removal of the solvent under reduced pressure afforded the crude product, which was purified by column chromatography on silica gel using hexane and ethyl acetate (8:2) mixture to afford the required product (3). TLC's have to be monitored by both UV and iodine.

### 3. Spectroscopic data for the products:

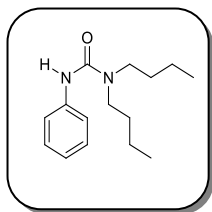

**1,1-dibutyl-3-phenylurea:**(compound **3a**): (**Isolated yield** = 85%): **IR**  $\text{cm}^{-1}$ : 3320, 2858, 2920, 1528, 1380, 1253, 731, 670.  **$^1\text{H}$  NMR**  $\delta$  ( 500 MHz,  $\text{CDCl}_3$ ): 7.38 (d,  $J=9.4$  Hz, 2H), 7.26 (t,  $J=8.2$  Hz, 2H), 7.00 (t,  $J=7.4$  Hz, 1H), 6.32 (br, 1H), 3.28 (t,  $J=7.6$  Hz, 4H), 1.59 (m, 4H), 1.37 (m, 4H), 0.95 (t,  $J=7.3$  Hz, 6H).  **$^{13}\text{C}$  NMR**  $\delta$  (75 MHz,  $\text{CDCl}_3$ ): 154.8, 139.2, 128.7, 122.7, 119.6, 47.4, 30.7, 20.1, 13.8. **MS (ESI):**  $m/z$  =249 (M+H)<sup>+</sup>. **HRMS** (ESI) (M+H)<sup>+</sup>  $m/z$  calcd for  $\text{C}_{15}\text{H}_{25}\text{N}_2\text{O}$  (M+H)<sup>+</sup> = 249.19614, found = 249.19710

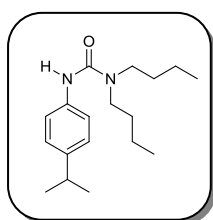

**1,1-dibutyl-3-(4-isopropylphenyl)urea:**(compound **3b**): (**Isolated yield** = 83%):**IR**  $\text{cm}^{-1}$  : 3327, 2958, 2929, 1638, 1518, 1420, 1221, 828, 732, 641.  **$^1\text{H}$  NMR**  $\delta$  (300 MHz,  $\text{CDCl}_3$ ): 7.27 (d,  $J=8.3$  Hz, 2H), 7.13 (d,  $J=8.3$  Hz, 2H), 6.24 (br, 1H), 3.27 (t,  $J=7.4$  Hz, 4H), 2.85 (m, 1H), 1.59 (m, 4H), 1.35 (m, 4H), 1.22 (d,  $J=7.0$  Hz, 6H), 0.95 (t,  $J=7.3$  Hz, 6H).  **$^{13}\text{C}$  NMR**  $\delta$  (75 MHz,  $\text{CDCl}_3$ ): 155.1, 143.5, 136.7, 126.6, 120.1, 47.5, 33.4, 30.8, 24.0, 20.2, 13.8. **MS** (ESI):  $m/z$  = 291(M+H)<sup>+</sup>, **HRMS:** ESI (M+H)<sup>+</sup>  $m/z$  calcd for  $\text{C}_{18}\text{H}_{31}\text{N}_2\text{O}$  (M+H)<sup>+</sup> = 291.24309, found = 291.24308.

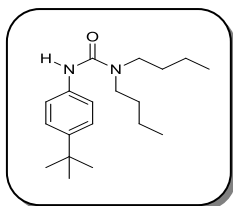

**1,1-dibutyl-3-(4-(tert-butyl)phenyl)urea:** (compound **3c**): (**Isolated yield** = 88%): **IR**  $\text{cm}^{-1}$ : 3304, 2959, 2431, 1639, 1520, 1417, 1295, 829, 732, 636.  **$^1\text{H}$  NMR**  $\delta$  (300 MHz,  $\text{CDCl}_3$ ): 7.63 (br, 4H), 6.62 (br, 1H), 3.65 (t,  $J=7.6$  Hz, 4H), 1.95 (m, 4H), 1.71 (m, 4H), 1.64 (s, 9H), 1.32 (t,  $J=7.3$  Hz, 6H).  **$^{13}\text{C}$  NMR**  $\delta$  (75 MHz,  $\text{CDCl}_3$ ): 155.1, 145.7, 136.4, 125.5, 119.7, 47.4, 34.1, 31.3, 30.7, 20.1, 13.8. **MS** (ESI):  $m/z$  = 305 (M+H)<sup>+</sup>, **HRMS:** ESI (M+H)<sup>+</sup>  $m/z$  calcd for  $\text{C}_{19}\text{H}_{33}\text{N}_2\text{O}$  (M+H)<sup>+</sup> = 305.25874, found = 305.25849.

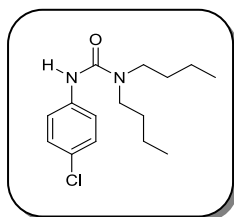

**1,1-dibutyl-3-(4-chlorophenyl)urea:** (compound **3d**): (**Isolated yield** = 73%): **IR**  $\text{cm}^{-1}$ : 3357, 2931, 2868, 1640, 1490, 1288, 1091, 823, 688.  **$^1\text{H}$  NMR**  $\delta$  (300 MHz,  $\text{CDCl}_3$ ) : 7.68 (d,  $J=8.8$  Hz, 2H), 7.55 (d,  $J=7.7$  Hz, 2H), 6.67 (br, 1H), 3.62 (t,  $J=7.4$  Hz, 4H), 1.93(m, 4H), 1.71 (m, 4H), 1.30 (t,  $J=7.3$  Hz, 6H).  **$^{13}\text{C}$  NMR**  $\delta$  (75 MHz,  $\text{CDCl}_3$ ): 154.6, 137.8, 128.5, 127.4, 120.9, 47.3, 30.6, 20.0, 13.7. **MS** (ESI):  $m/z$  = 283(M+H)<sup>+</sup>, **HRMS:** ESI (M+H)<sup>+</sup>  $m/z$  calcd for  $\text{C}_{15}\text{H}_{24}\text{N}_2\text{OCl}$  (M+H)<sup>+</sup> = 283.15717, found = 283.15592

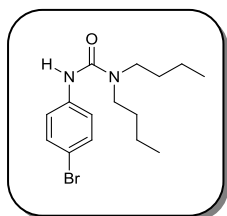

**3-(4-bromophenyl)-1,1-dibutylurea:** (compound **3e**): **Isolated yield** = 77%): **IR**  $\text{cm}^{-1}$ : 3314, 2958, 2929, 1641, 1523, 1488, 1222, 1009, 820, 632.  **$^1\text{H}$  NMR**  $\delta$  (300 MHz,  $\text{CDCl}_3$ ): 7.38 (d,  $J=9.0$  Hz, 2H), 7.29 (d,  $J=8.3$  Hz, 2H), 6.33 (br, 1H), 3.30 (t,  $J=7.5$  Hz, 4H), 1.62 (m, 4H), 1.37 (m, 4H), 0.98 (t,  $J=6.7$  Hz, 6H).  **$^{13}\text{C}$  NMR**  $\delta$  (75 MHz,  $\text{CDCl}_3$ ): 154.5, 138.3, 131.5, 121.2, 114.9, 47.3, 30.6, 20.1, 13.7. **MS** (ESI):  $m/z$  = 349 (M+Na)<sup>+</sup>, **HRMS:** ESI (M+H)<sup>+</sup>  $m/z$  calcd for  $\text{C}_{15}\text{H}_{24}\text{N}_2\text{OBr}$  (M+H)<sup>+</sup> = 327.10665, found = 327.10668.

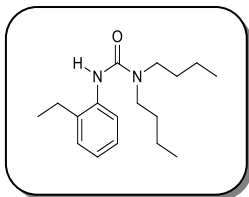

**1,1-dibutyl-3-(2-ethylphenyl)urea:** (Compound **3f**): (Isolated yield = 80%): IR $\text{cm}^{-1}$ : 3315, 2958, 2930, 1632, 1516, 1374, 1252, 1032, 748, 626.  $^1\text{H NMR } \delta$  (300 MHz,  $\text{CDCl}_3$ ): 8.12 (d,  $J=7.9$  Hz, 1H), 7.15 (t,  $J=6.5$  Hz, 2H), 7.36 (t,  $J=7.3$  Hz, 1H), 6.58 (br, 1H), 3.65 (t,  $J=7.6$  Hz, 4H), 2.91 (q,  $J=7.6$  Hz, 2H), 1.96 (m, 4H), 1.72 (m, 4H), 1.56 (t,  $J=7.6$  Hz, 3H), 1.31 (t,  $J=7.3$  Hz, 4H).  $^{13}\text{C NMR } \delta$  (75 MHz,  $\text{CDCl}_3$ ): 155.0, 136.5, 133.5, 128.0, 126.3, 123.5, 122.7, 47.4, 30.6, 24.3, 20.0, 13.7. MS (ESI):  $m/z = 277$  (M+H) $^+$ , HRMS: ESI (M+H) $^+$   $m/z$  calcd for  $\text{C}_{17}\text{H}_{29}\text{N}_2\text{O}$  (M+H) $^+$  = 277.22744, found = 277.22705.

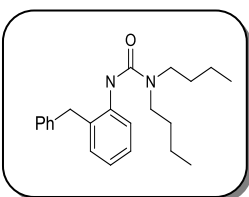

**3-(2-benzylphenyl)-1,1-dibutylurea:**(compound **3g**): (Isolated yield = 78%): IR  $\text{cm}^{-1}$ : 3338, 2957, 2930, 1638, 1516, 1450, 1297, 1030, 752, 698.  $^1\text{H NMR } \delta$  (500 MHz,  $\text{CDCl}_3$ ): 7.82 (d,  $J=7.5$  Hz, 1H), 7.27 (m, 5H), 7.10 (m, 3H), 5.96 (br, 1H), 4.01 (s, 2H), 3.01 (t,  $J=7.5$  Hz, 4H), 1.33 (m, 4H), 1.15 (m, 4H), 0.83 (t,  $J=7.5$  Hz, 6H).  $^{13}\text{C NMR } \delta$  (75 MHz,  $\text{CDCl}_3$ ): 155.0, 136.5, 133.5, 132.4, 128.0, 126.3, 123.5, 122.7, 47.4, 30.6, 24.3, 20.0, 13.7. MS (ESI):  $m/z = 339$  (M+H) $^+$ , HRMS (ESI) (M+H) $^+$   $m/z$  calcd for  $\text{C}_{22}\text{H}_{31}\text{N}_2\text{O}$  (M+H) $^+$  = 339.24309, found = 339.24144

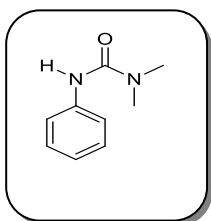

**1,1-dimethyl-3-phenylurea:** (compound **3h**): (Isolated yield=82%): IR $\text{cm}^{-1}$ : 3251, 2926, 2856, 1727, 1642, 1598, 1513, 1245, 752, 631.  $^1\text{H NMR } \delta$  (300 MHz,  $\text{CDCl}_3$ ): 7.39 (d,  $J=9.0$  Hz, 2H), 7.29 (t,  $J=7.5$  Hz, 2H), 7.04 (t,  $J=6.7$  Hz, 1H), 6.47 (br, 1H), 3.03 (s, 6H).  $^{13}\text{C NMR } \delta$  (75 MHz,  $\text{CDCl}_3$ ): 155.7, 139.1, 128.6, 122.7, 119.8, 36.3. MS (ESI):  $m/z = 165$  (M+H) $^+$ , HRMS: ESI (M+H) $^+$   $m/z$  calcd for  $\text{C}_9\text{H}_{13}\text{N}_2\text{O}$  (M+H) $^+$  = 165.10224, found = 165.10179.

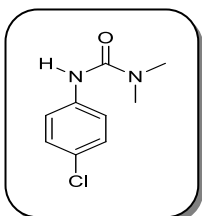

**3-(4-chlorophenyl)-1,1-dimethylurea:** (compound **3i**): (Isolated yield =72%): IR  $\text{cm}^{-1}$ : 3260, 2930, 2867, 1650, 1590, 1278, 730, 650.  $^1\text{H NMR } \delta$  (500 MHz,  $\text{CDCl}_3$ ): 7.30 (d,  $J=9.0$  Hz, 2H), 7.24 (d,  $J=9.0$  Hz, 2H), 6.34 (br, 1H), 3.02 (s, 6H).  $^{13}\text{C NMR } \delta$  (75 MHz,  $\text{CDCl}_3$ ): 155.4, 137.7, 128.7, 127.8, 121.0, 36.4. MS (ESI):  $m/z = 199$  (M+H) $^+$ .

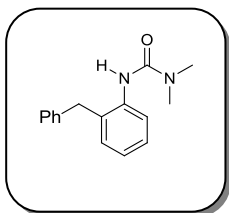

**3-(2-benzylphenyl)-1,1-dimethylurea:** (compound **3j**): (Isolated yield =76%): IR  $\text{cm}^{-1}$ : 3254, 2927, 2858, 1650, 1493, 1394, 1166, 1068, 731, 622.  $^1\text{H NMR } \delta$  (500 MHz,  $\text{CDCl}_3$ ): 7.84 (d,  $J=7.5$  Hz, 1H), 7.30 (m, 5H), 7.13 (m, 3H), 5.98 (br, 1H), 4.01 (s, 2H), 3.02 (s, 6H).  $^{13}\text{C NMR } \delta$  (75 MHz,  $\text{CDCl}_3$ ): 158.0, 137.1, 133.3, 132.1, 130.5, 128.9, 128.3, 126.4, 36.6, 36.4. MS (ESI):  $m/z = 255$  (M+H) $^+$ , HRMS: ESI (M+H) $^+$   $m/z$  calcd for  $\text{C}_{16}\text{H}_{19}\text{N}_2\text{O}$  (M+H) $^+$  = 255.14919, found = 255.14852.

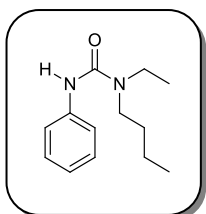

**1-butyl-1-ethyl-3-phenylurea:** (compound **3k**): (Isolated yield =82%): IR  $\text{cm}^{-1}$ : 3337, 2960, 2930, 1639, 1531, 1444, 1308, 1241, 751, 693.  $^1\text{H NMR } \delta$  (300 MHz,  $\text{CDCl}_3$ ): 7.39 (d,  $J=7.5$  Hz, 2H), 7.26 (t,  $J=7.5$  Hz, 2H), 7.00 (t,  $J=7.5$  Hz, 1H), 6.36 (br, 1H), 3.30 (m, 4H), 1.59 (m, 2H), 1.37 (m, 2H), 1.20 (t,  $J=6.7$  Hz, 3H), 0.95 (t,  $J=7.5$  Hz, 3H).  $^{13}\text{C NMR } \delta$  (75 MHz,  $\text{CDCl}_3$ ): 154.7, 139.2, 128.5, 122.5, 119.7, 46.7, 41.8, 30.7, 20.0, 13.7,

13.5. **MS** (ESI):  $m/z = 221(M+H)^+$ , **HRMS**: ESI  $(M+H)^+$   $m/z$  calcd for  $C_{13}H_{21}N_2O$   $(M+H)^+ = 221.16484$ , found = 221.16380.

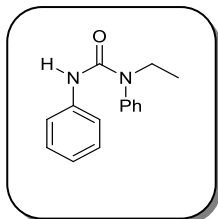

**1-ethyl-1,3-diphenylurea**: (compound **3l**): (Isolated yield = 70% ): **IR**  $cm^{-1}$ : 3424, 2932, 2873, 1669, 1594, 1440, 1238, 1142, 750, 696.  **$^1H$  NMR**  $\delta$  (300 MHz,  $CDCl_3$ ): 7.85 (t,  $J=7.7$  Hz, 2H), 7.76 (t,  $J=7.1$  Hz, 1H), 7.63 (m, 6H), 7.32 (t,  $J=7.3$  Hz, 1H), 6.47 (br, 1H), 4.16 (q,  $J=7.1$  Hz, 2H), 1.53 (t,  $J=7.1$  Hz, 3H).  **$^{13}C$  NMR**  $\delta$  (75 MHz,  $CDCl_3$ ): 153.8, 141.0, 138.8, 130.1, 128.6, 128.0, 122.6, 119.1, 44.1, 13.6. **MS** (ESI):  $m/z = 241$   $(M+H)^+$ , **HRMS**: ESI  $(M+H)^+$   $m/z$  calcd for  $C_{15}H_{17}N_2O$   $(M+H)^+ = 241.13354$ , found = 241.13249.

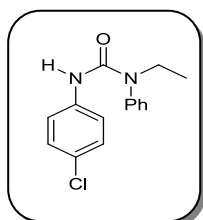

**3-(4-chlorophenyl)-1-ethyl-1-phenylurea**: (compound **3m**): (Isolated yield = 68%): **IR**  $cm^{-1}$ : 3421, 2974, 2930, 1667, 1592, 1494, 1371, 1283, 753, 628.  **$^1H$  NMR**  $\delta$  (300 MHz,  $CDCl_3$ ): 7.50 (t,  $J=7.6$  Hz, 2H), 7.31 (t,  $J=8.2$  Hz, 5H), 7.17 (d,  $J=8.8$  Hz, 2H), 6.07 (br, 1H), 3.78 (q,  $J=7.0$  Hz, 2H), 1.16 (t,  $J=7.0$  Hz, 3H).  **$^{13}C$  NMR**  $\delta$  (75 MHz,  $CDCl_3$ ): 154.2, 141.4, 139.2, 130.5, 129.0, 128.4, 123.0, 119.5, 44.5, 14.0. **MS** (ESI):  $m/z = 275$   $(M+H)^+$ , **HRMS**: ESI  $(M+H)^+$   $m/z$  calcd for  $C_{15}H_{16}N_2OCl$   $(M+H)^+ = 275.09457$ , found = 275.09446.

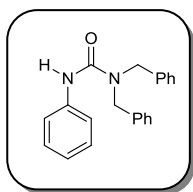

**1,1-dibenzyl-3-phenylurea**: (compound **3n**): (Isolated yield = 65%): **IR**  $cm^{-1}$ : 3356, 2925, 2839, 1641, 1535, 1446, 1237, 1019, 750, 694.  **$^1H$  NMR**  $\delta$  (500 MHz,  $CDCl_3$ ): 7.74 (t,  $J=6.7$  Hz, 4H), 7.68 (t,  $J=7.4$  Hz, 6H), 7.59 (d,  $J=7.2$  Hz, 4H), 7.36 (m, 1H), 6.76 (br, 1H), 4.97 (s, 4H).  **$^{13}C$  NMR**  $\delta$  (75 MHz,  $CDCl_3$ ): 156.2, 146.2, 137.4, 129.1, 127.9, 127.5, 125.8, 120.0, 50.9. **MS** (ESI):  $m/z = 317$   $(M+H)^+$ , **HRMS**: ESI  $(M+H)^+$   $m/z$  calcd for  $C_{21}H_{21}N_2O$   $(M+H)^+ = 317.16382$ , found = 317.16304.

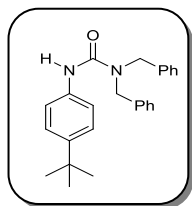

**1,1-dibenzyl-3-(4-(tert-butyl)phenyl)urea**: (compound **3o**): (Isolated yield = 70%): **IR**:  $cm^{-1}$ : 3342, 2920, 2842, 1638, 1545, 1452, 1235, 1018, 753, 687.  **$^1H$  NMR**  $\delta$  (300 MHz,  $CDCl_3$ ): 7.71 (m, 4H), 7.67 (m, 6H), 7.60 (m, 2H), 7.51 (d,  $J=8.3$  Hz, 2H), 6.67 (br, 1H), 4.97 (s, 4H), 1.63 (s, 9H).  **$^{13}C$  NMR**  $\delta$  (75 MHz,  $CDCl_3$ ): 156.0, 146.0, 137.2, 136.1, 128.9, 127.7, 127.3, 125.5, 119.7, 50.7, 34.1, 31.3. **MS** (ESI):  $m/z = 373$   $(M+H)^+$ , **HRMS**: ESI  $(M+H)^+$   $m/z$  calcd for  $C_{25}H_{29}N_2O$   $(M+H)^+ = 373.22682$ , found = 373.22773.

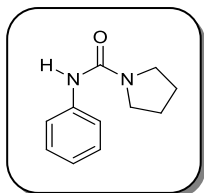

**N-phenylpyrrolidine-1-carboxamide**: (compound **3p**): (Isolated yield = 83%): **IR**  $cm^{-1}$ : 3307, 2970, 1644, 1530, 1442, 1380, 1242, 753, 693.  **$^1H$  NMR**  $\delta$  (300 MHz,  $CDCl_3$ ): 7.41 (d,  $J=8.2$  Hz, 2H), 7.26 (m, 2H), 7.00 (t,  $J=6.4$  Hz, 1H), 6.29 (br, 1H), 3.43 (br, 4H), 1.93 (br, 4H).  **$^{13}C$  NMR**  $\delta$  (75 MHz,  $CDCl_3$ ): 153.8, 138.0, 129.0, 120.8, 46.0, 25.8. **MS** (ESI):  $m/z = 191$   $(M+H)^+$ , **HRMS**: ESI  $(M+H)^+$   $m/z$  calcd for  $C_{11}H_{15}N_2O$   $(M+H)^+ = 191.11789$ , found = 191.11707.

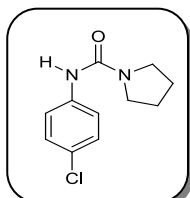

**N-(4-chlorophenyl)pyrrolidine-1-carboxamide**: (compound **3q**): (Isolated yield = 80%): **IR**  $cm^{-1}$ : 3315, 2973, 1653, 1525, 1458, 1382, 1247, 751, 692.  **$^1H$  NMR**  $\delta$  (300

MHz, CDCl<sub>3</sub>): 7.41 (d, *J*=8.8 Hz, 2H), 7.26 (d, *J*=8.8 Hz, 2H), 6.25 (br, 1H), 3.42 (t, *J*=6.7 Hz, 4H), 1.99 (t, *J*=6.6 Hz, 4H). <sup>13</sup>C NMR δ (75 MHz, CDCl<sub>3</sub>): 153.6, 137.7, 128.7, 127.5, 120.6, 45.7, 25.5. MS (ESI): *m/z* = 225 (M+H)<sup>+</sup>, HRMS: ESI (M+H)<sup>+</sup> *m/z* calcd for C<sub>11</sub>H<sub>14</sub>N<sub>2</sub>OCl (M+H)<sup>+</sup> = 225.07892, found = 225.07889.

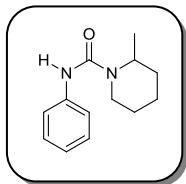

**2-methyl-N-phenylpiperidine-1-carboxamide:** (compound **3r**): (Isolated yield =76%): IR cm<sup>-1</sup>: 3315, 2929, 2856, 1633, 1532, 1442, 1238, 1060, 750, 693. <sup>1</sup>H NMR δ (300 MHz, CDCl<sub>3</sub>): 7.36 (d, *J*=8.6 Hz, 2H), 7.26 (t, *J*=7.3 Hz, 2H), 7.02 (t, *J*=7.3 Hz, 1H), 6.35 (br, 1H), 4.38 (m, 1H), 3.88 (br, 1H), 3.00 (br, 1H), 1.75-1.62 (m, 6H), 1.24 (d, *J*=7.0 Hz, 3H). <sup>13</sup>C NMR δ (75 MHz, CDCl<sub>3</sub>): 154.9, 139.3, 128.7, 122.7, 119.9, 46.6, 39.0, 30.2, 25.5, 18.5, 15.7. MS (ESI): *m/z* = 219 (M+H)<sup>+</sup>, HRMS: ESI (M+H)<sup>+</sup> *m/z* calcd for C<sub>13</sub>H<sub>19</sub>N<sub>2</sub>O (M+H)<sup>+</sup> = 219.14919, found = 219.14831.

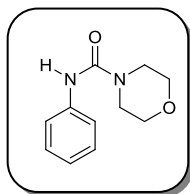

**N-phenylmorpholine-4-carboxamide:** (compound **3s**): (Isolated yield=84%): IR cm<sup>-1</sup>: 3320, 2771, 1648, 1532, 1460, 1378, 1245, 755, 687. <sup>1</sup>H NMR δ (500 MHz, CDCl<sub>3</sub>): 7.35 (d, *J*=7.4 Hz, 2H), 7.28 (t, *J*=7.4 Hz, 2H), 7.04 (t, *J*=7.3 Hz, 1H), 6.48 (br, 1H), 3.71 (t, *J*=5.0 Hz, 4H), 3.46 (t, *J*=5.0 Hz, 4H). <sup>13</sup>C NMR δ (75 MHz, CDCl<sub>3</sub>): 155.1, 138.6, 128.8, 123.3, 120.0, 66.4, 44.2. MS (ESI): *m/z* = 207 (M+H)<sup>+</sup>, HRMS: ESI (M+H)<sup>+</sup> *m/z* calcd for C<sub>11</sub>H<sub>15</sub>N<sub>2</sub>O<sub>2</sub> (M+H)<sup>+</sup> = 207.11280, found = 207.11223.

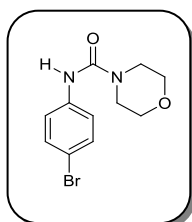

**N-(4-bromophenyl)morpholine-4-carboxamide:** (compound **3t**): (Isolated yield =80%): IR cm<sup>-1</sup>: 3327, 2768, 1644, 1530, 1467, 1375, 1245, 751, 682. <sup>1</sup>H NMR δ (300 MHz, CDCl<sub>3</sub>): 7.41 (d, *J*=9.06 Hz, 2H), 7.27 (d, *J*=9.02 Hz, 2H), 6.36 (br, 1H), 3.74 (t, *J*=4.5 Hz, 4H), 3.47 (t, *J*=4.5 Hz, 4H). <sup>13</sup>C NMR δ (75 MHz, CDCl<sub>3</sub>): 154.8, 137.8, 131.7, 121.6, 115.8, 66.4, 44.2. MS (ESI): *m/z* = 285 (M+H)<sup>+</sup>.

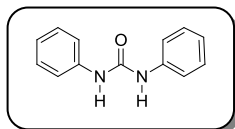

**1,3-diphenylurea:** (compound **5a**): (Isolated yield =67%). IR cm<sup>-1</sup>: 3330, 1655, 1589, 1558, 1240. <sup>1</sup>H NMR δ (300 MHz, CDCl<sub>3</sub>): 8.37 (br, 2H), 7.46 (d, *J*=7.7 Hz, 4H), 7.26 (t, *J*=7.55 Hz, 4H), 6.99 (t, *J*=7.3 Hz, 2H). <sup>13</sup>C NMR δ (75 MHz, CDCl<sub>3</sub> + DMSO): 152.4, 138.9, 128.1, 121.4, 117.9. MS (ESI): *m/z* = 213 (M+H)<sup>+</sup>, HRMS: ESI (M+H)<sup>+</sup> *m/z* calcd for C<sub>13</sub>H<sub>13</sub>N<sub>2</sub>O (M+H)<sup>+</sup> = 213.10224, found = 213.10253.

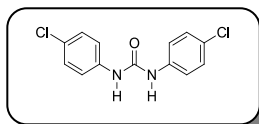

**1,3-bis(4-chlorophenyl)urea:** (compound **5b**): (Isolated yield =60%): IR cm<sup>-1</sup>: 3329, 1657, 1589, 1560, 1232. <sup>1</sup>H NMR δ (300 MHz, CDCl<sub>3</sub>): 8.05 (br, 2H), 7.56 (m, 8H). <sup>13</sup>C NMR δ (75 MHz, CDCl<sub>3</sub>): 154.8, 134.1, 132.4, 121.9, 119.3. MS (ESI): *m/z* = 298 (M+NH<sub>4</sub>)<sup>+</sup>.

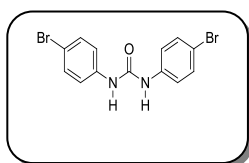

**1,3-bis(4-bromophenyl)urea:** (compound **5c**): (Isolated yield =62%): IR cm<sup>-1</sup>: 3328, 1653, 1598, 1552, 1233. <sup>1</sup>H NMR δ (300 MHz, CDCl<sub>3</sub>): 8.04 (br, 2H), 7.54 (m, 8H). <sup>13</sup>C NMR δ (75 MHz, CDCl<sub>3</sub>): 154.6, 134.1, 132.3, 122.1, 119.4. MS (ESI): *m/z* = 368 (M+H)<sup>+</sup>, HRMS: ESI (M+H)<sup>+</sup> *m/z* calcd for C<sub>13</sub>H<sub>11</sub>ON<sub>2</sub>Br<sub>2</sub> (M+H)<sup>+</sup> = 368.89946, found = 368.90629.

#### 4 Copies of $^1\text{H}$ NMR, $^{13}\text{C}$ NMR spectra for products

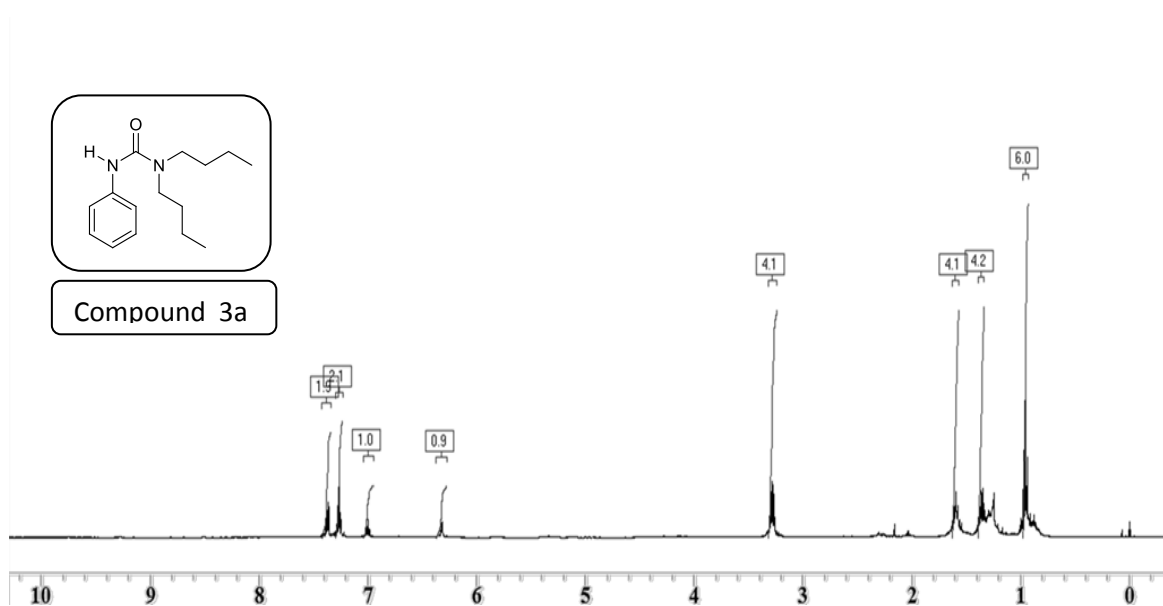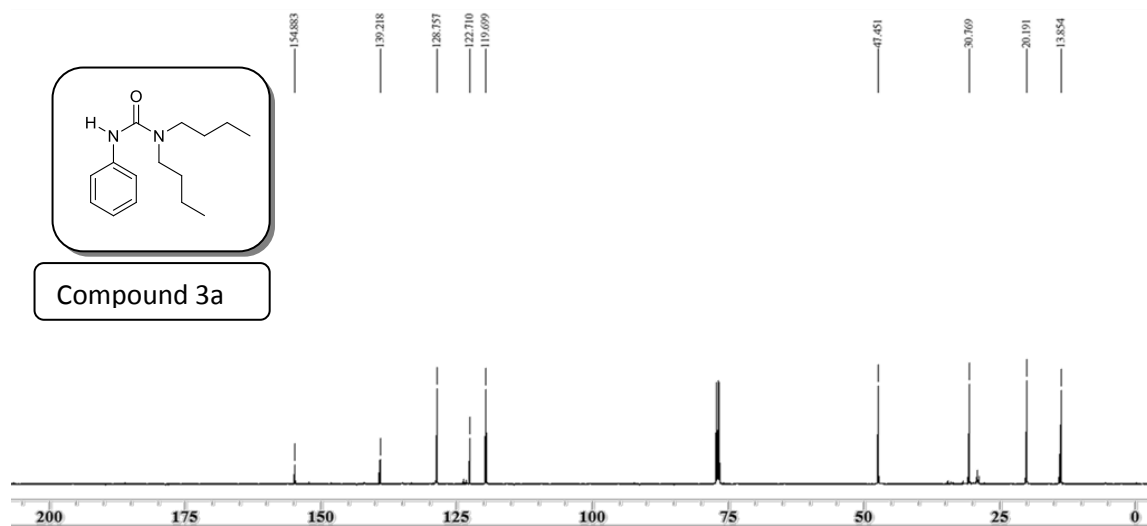

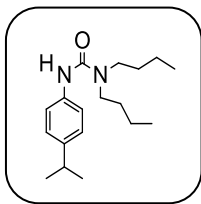

Compound 3b

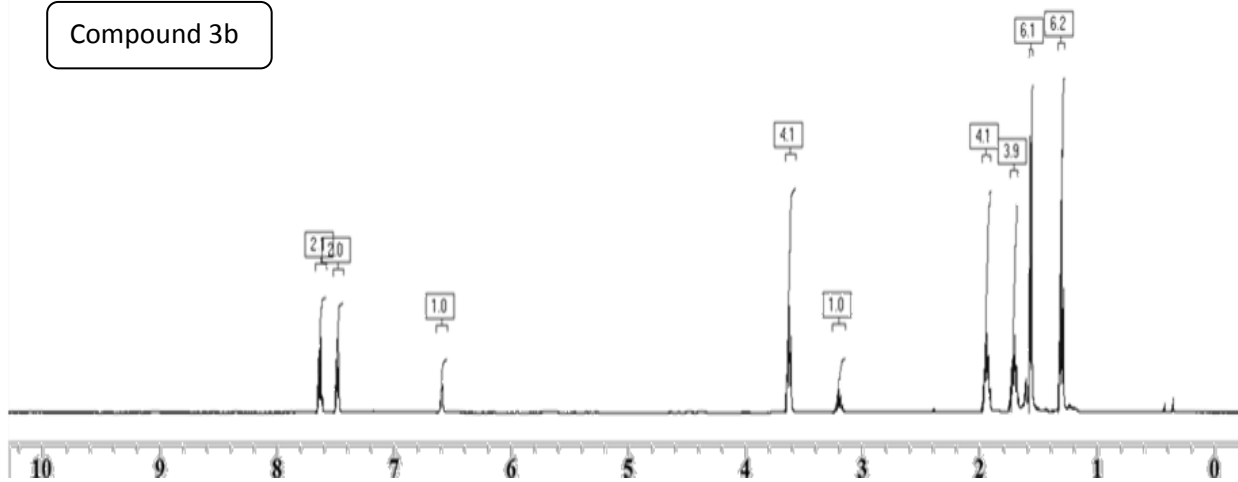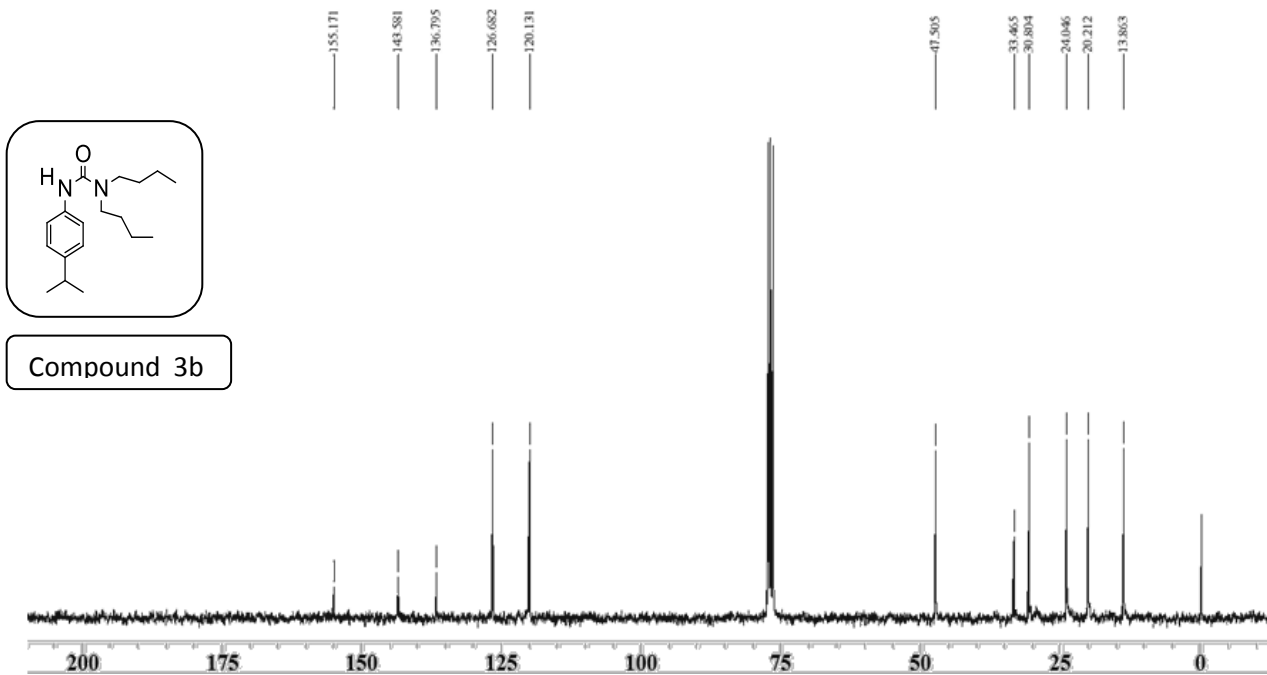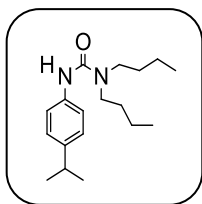

Compound 3b



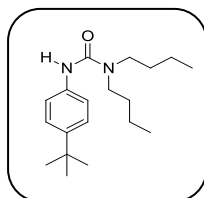

Compound 3c

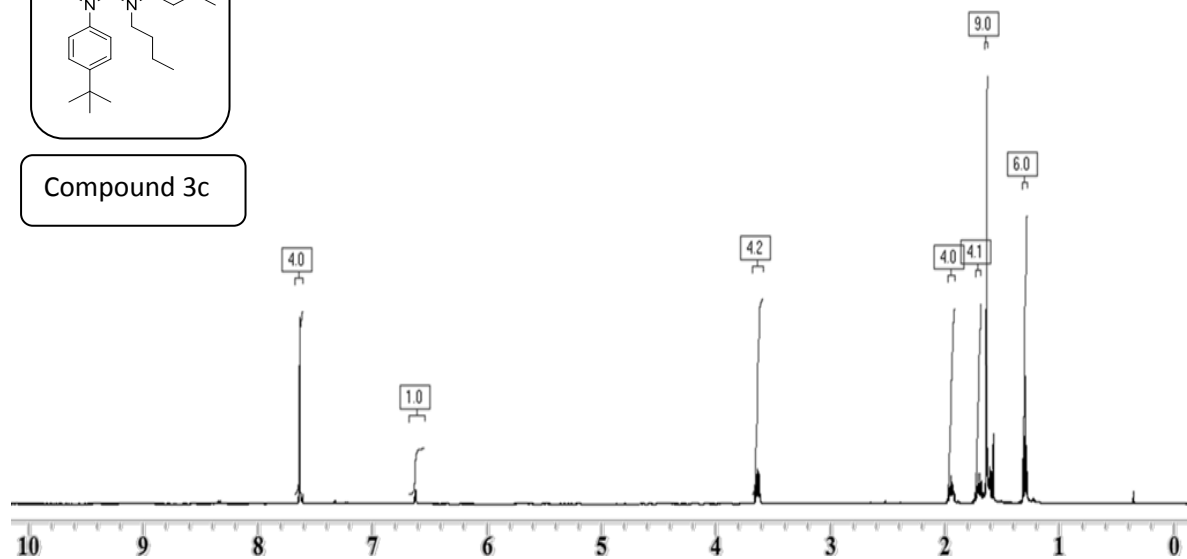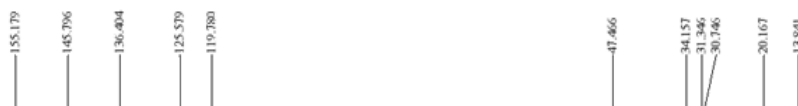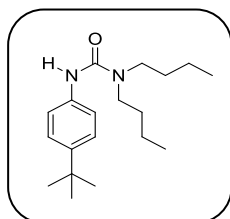

Compound 3c

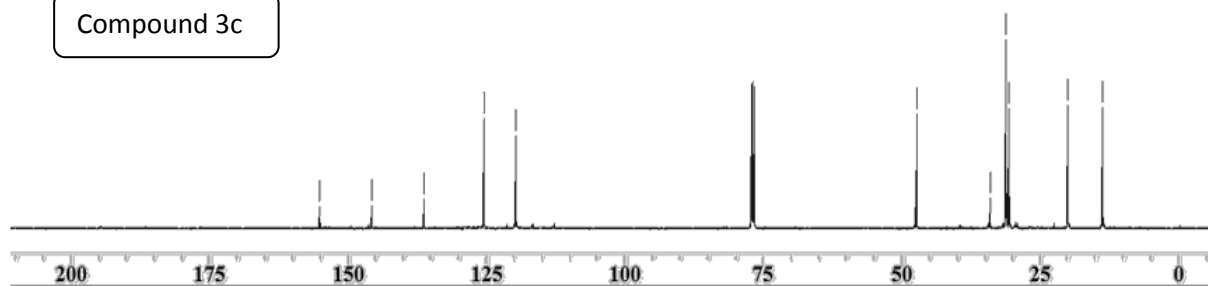

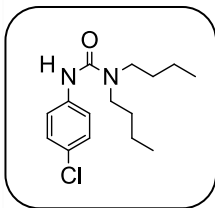

Compound 3d

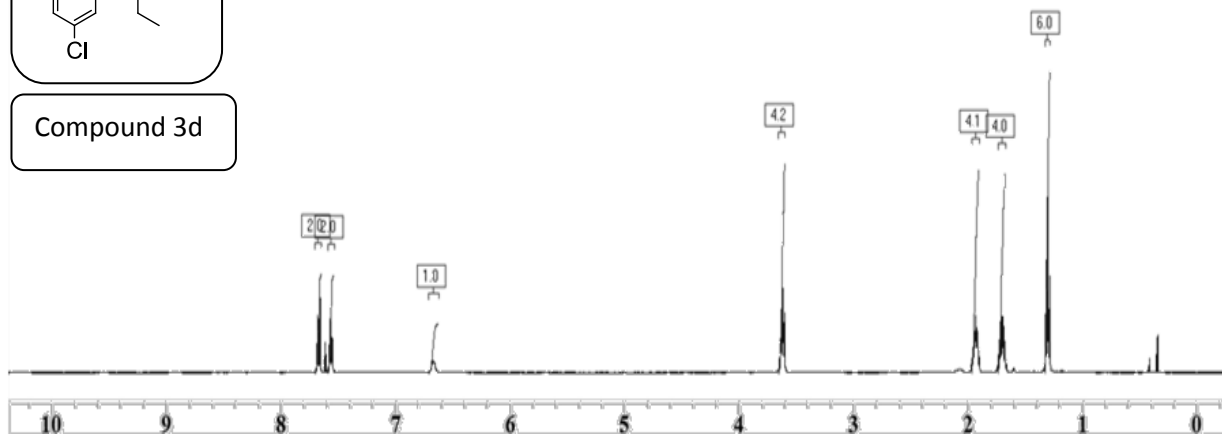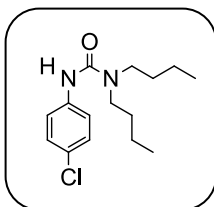

Compound 3d

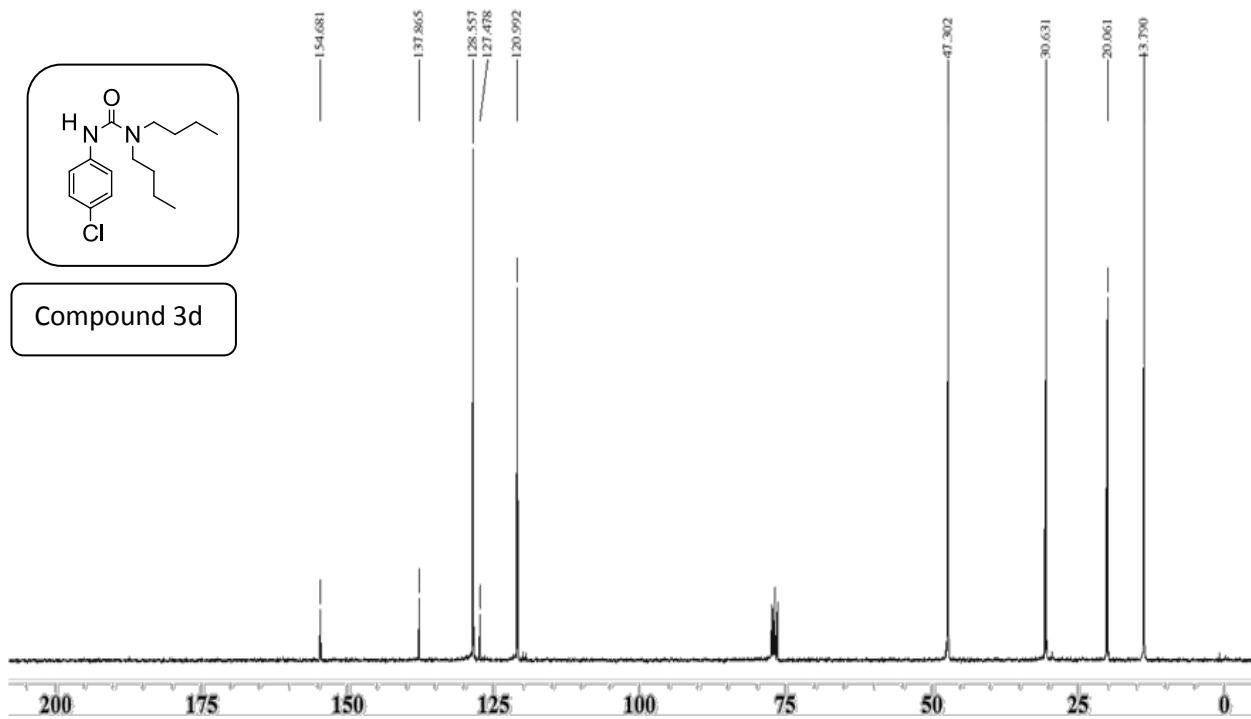

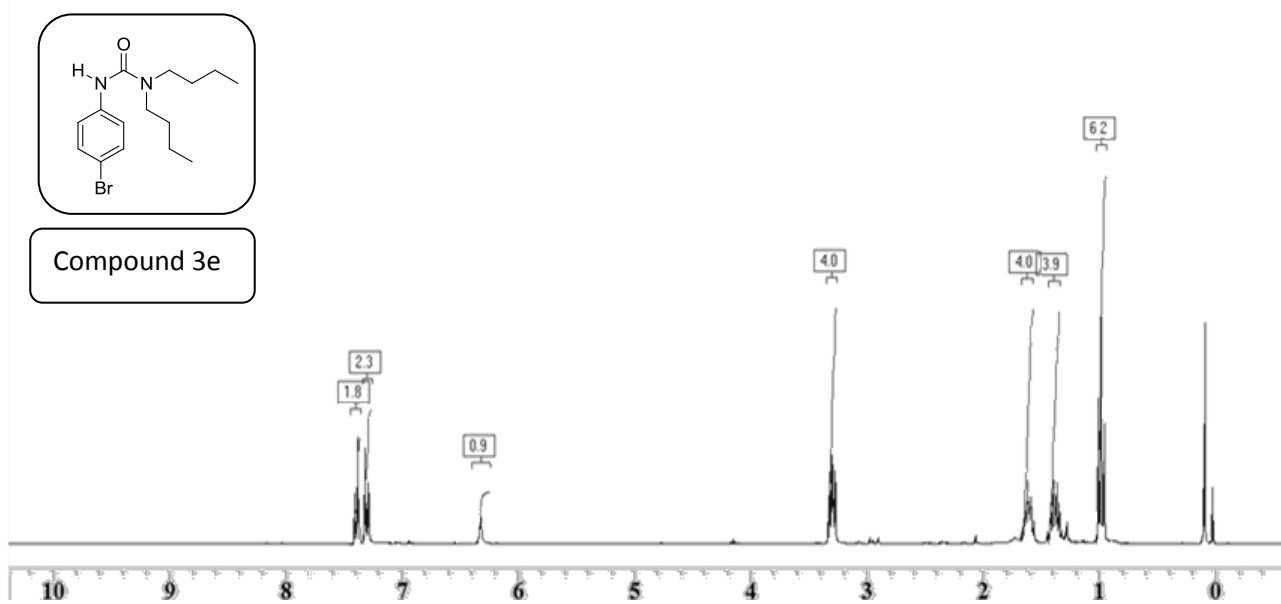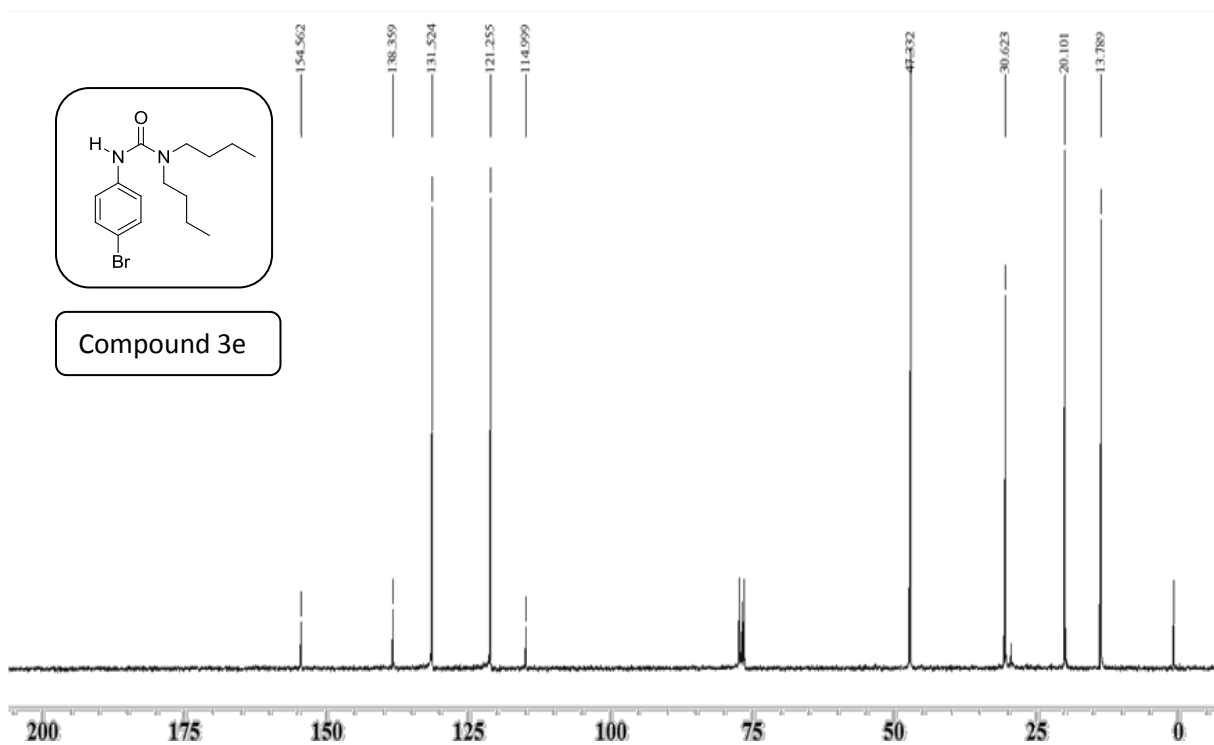

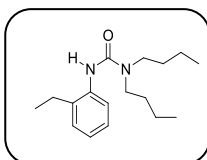

Compound 3f

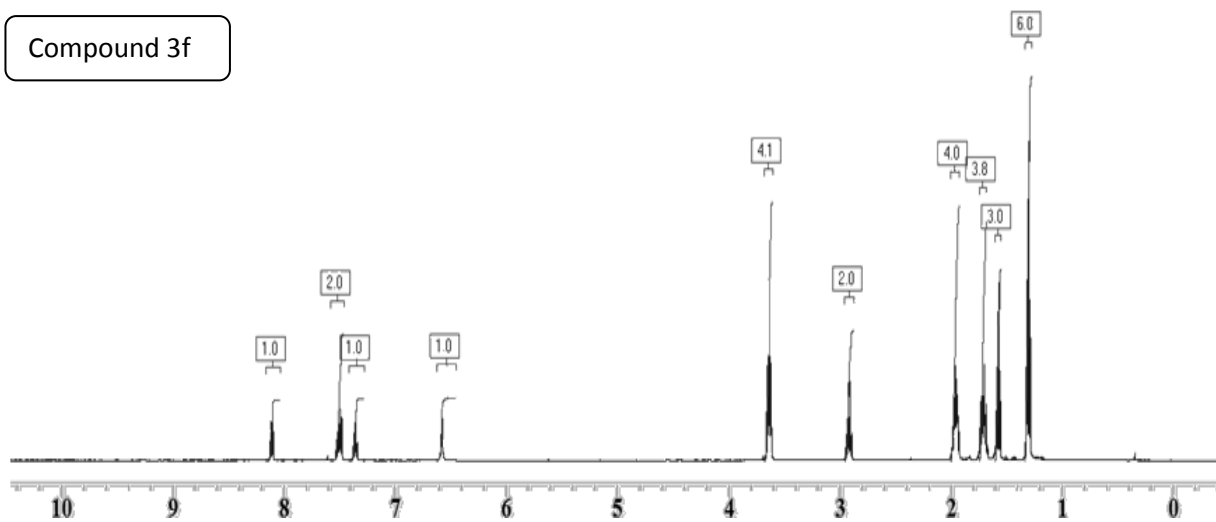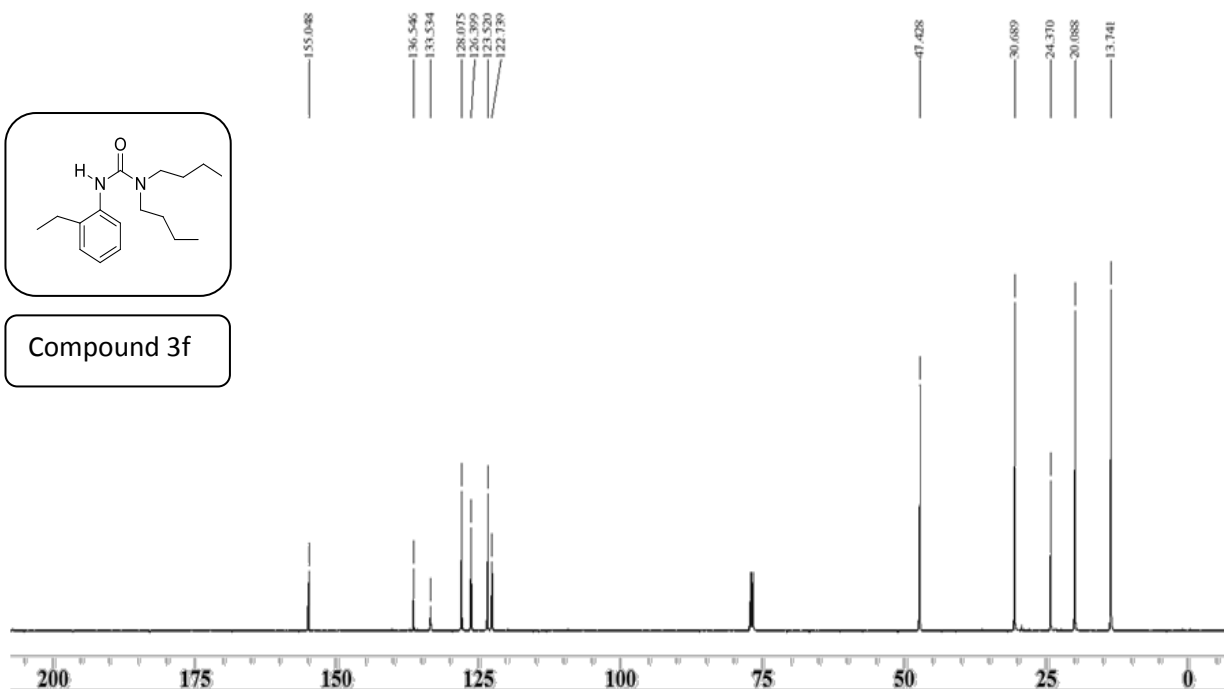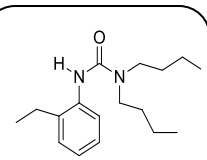

Compound 3f

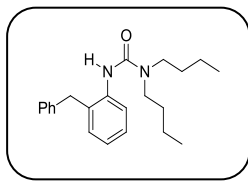

Compound 3g

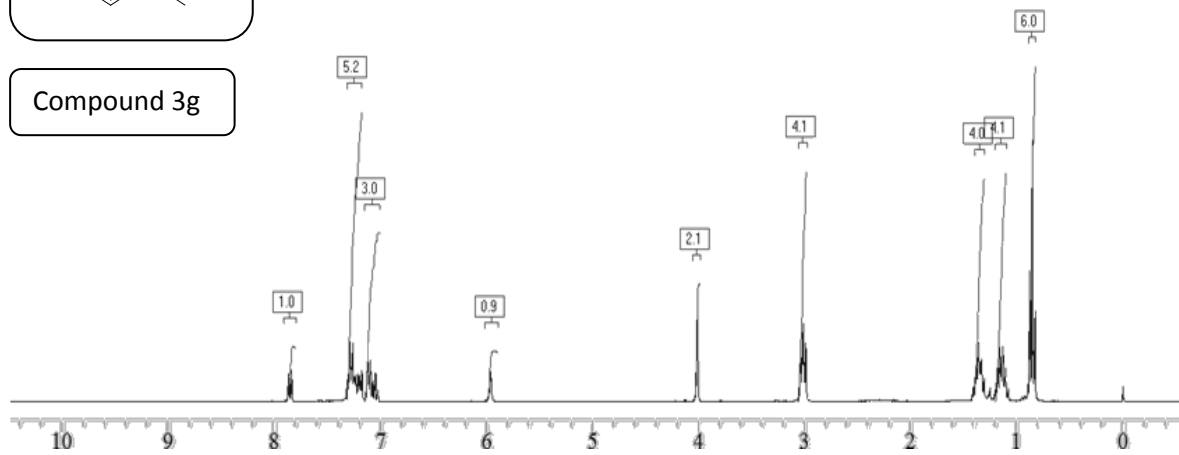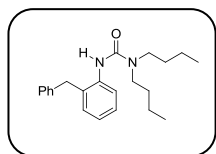

Compound 3g

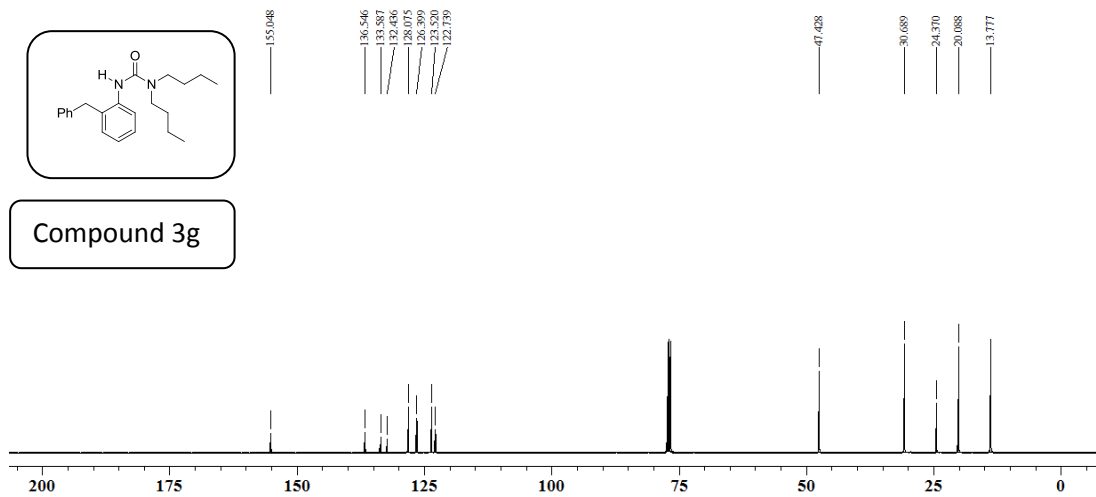

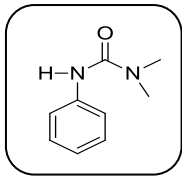

Compound 3h

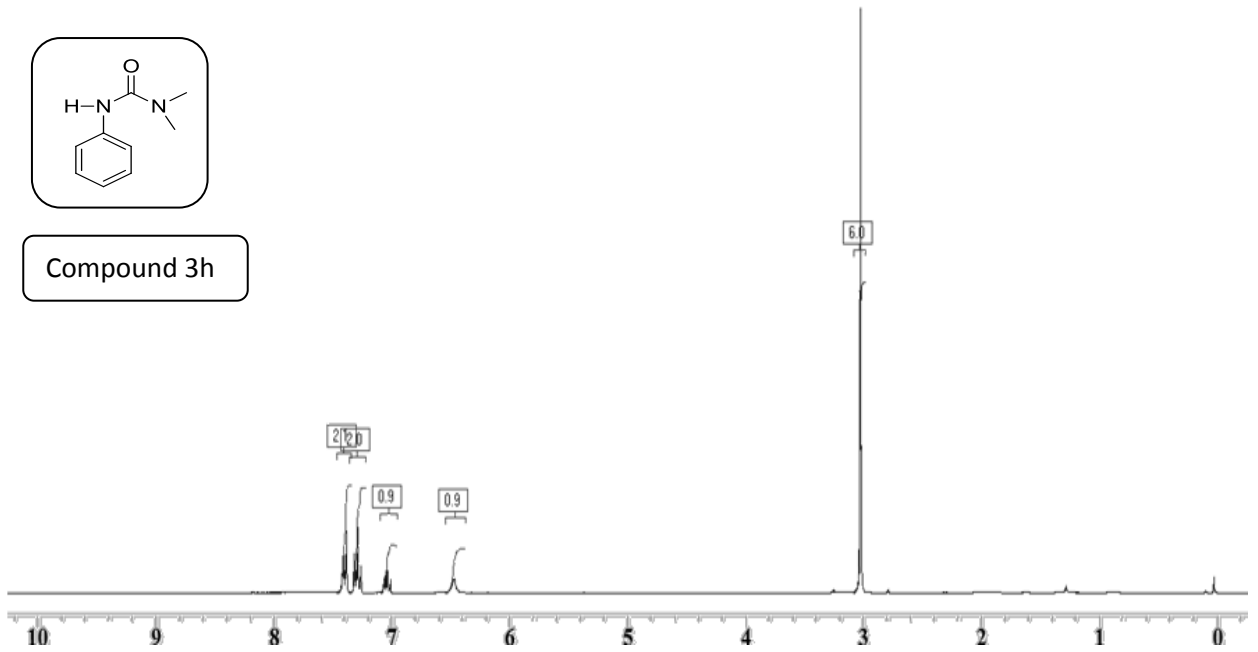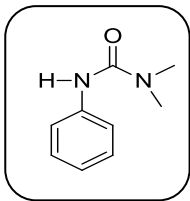

Compound 3h

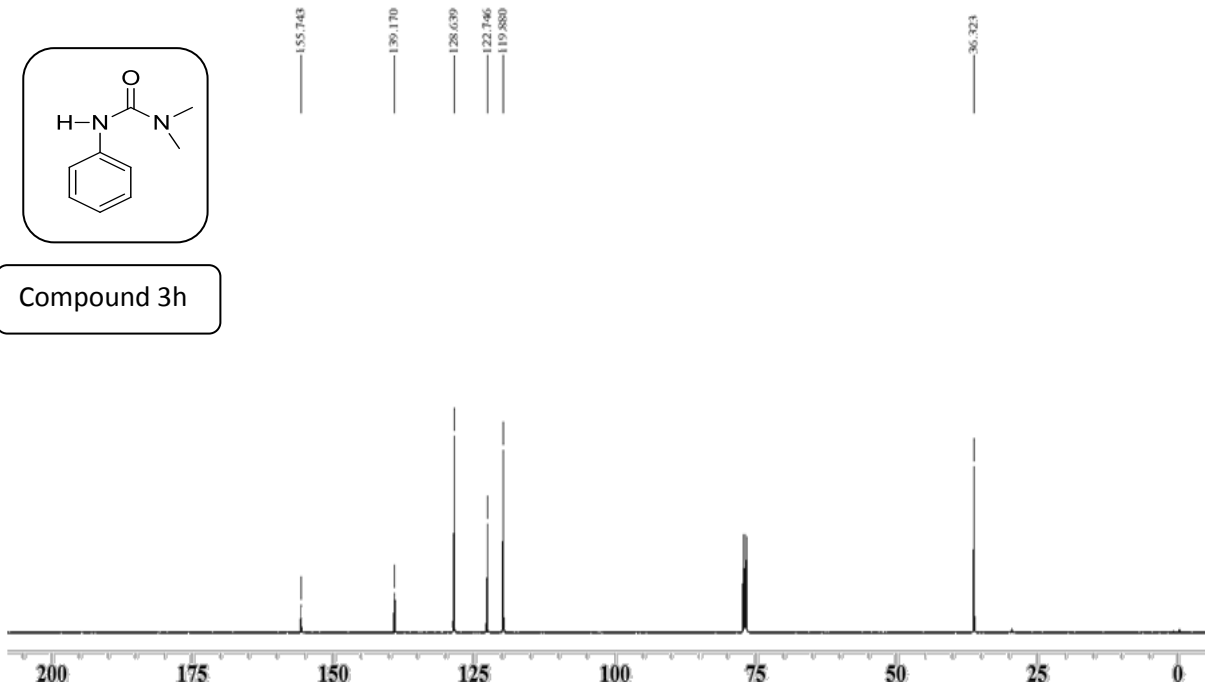

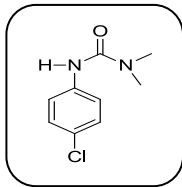

Compound 3i

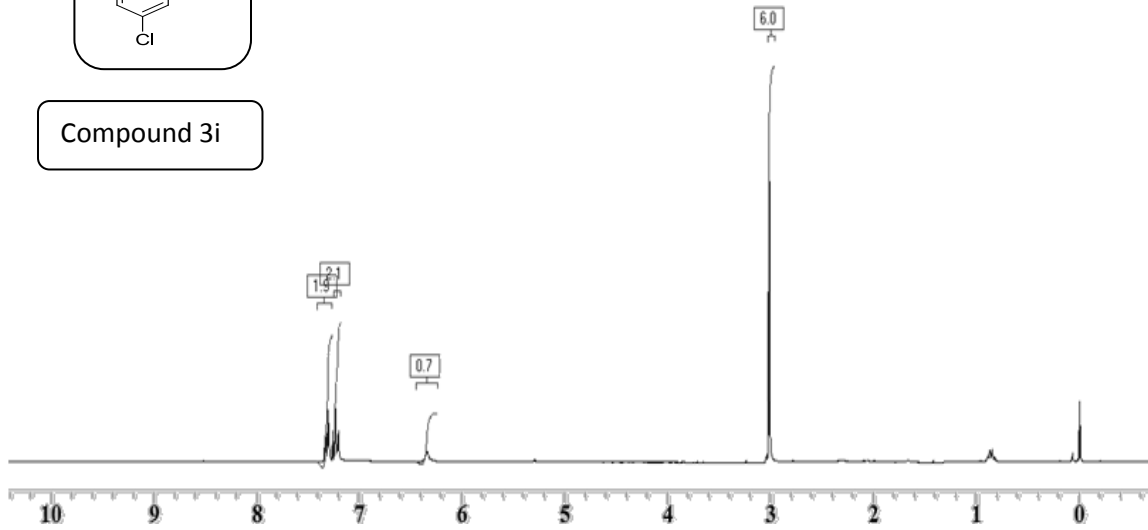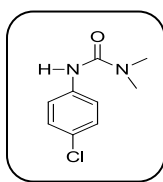

Compound 3i

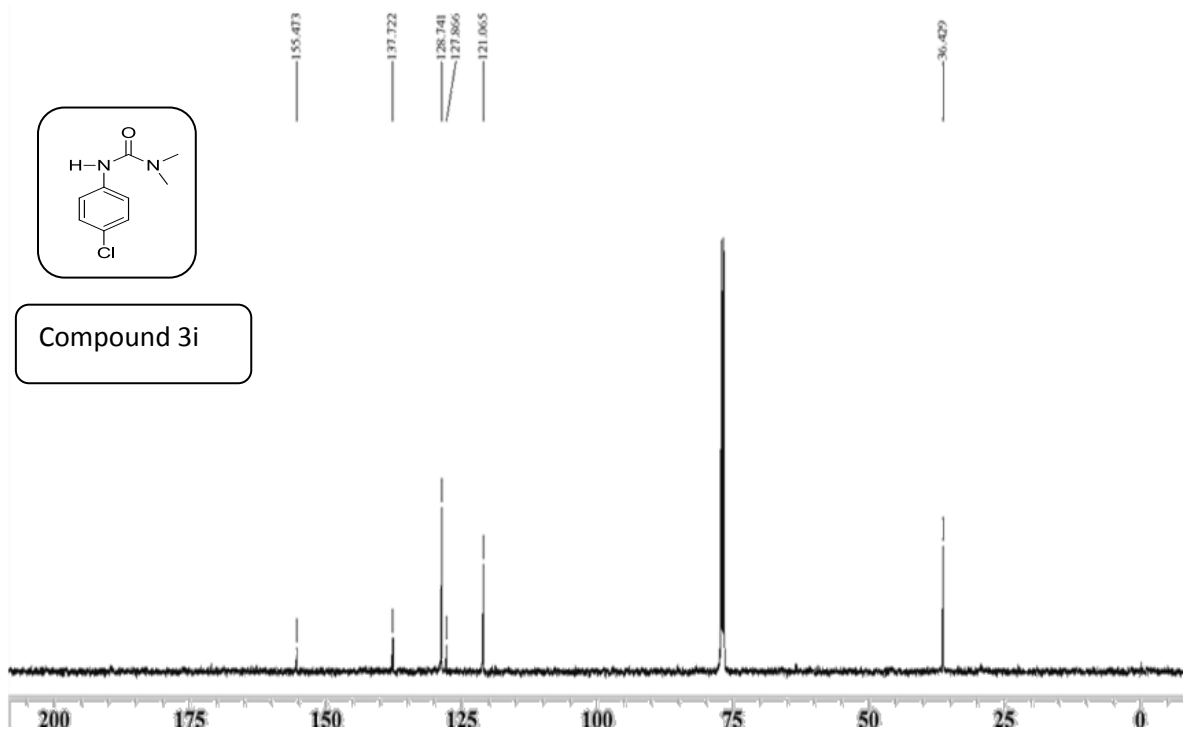

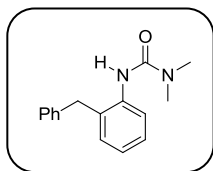

Compound 3j

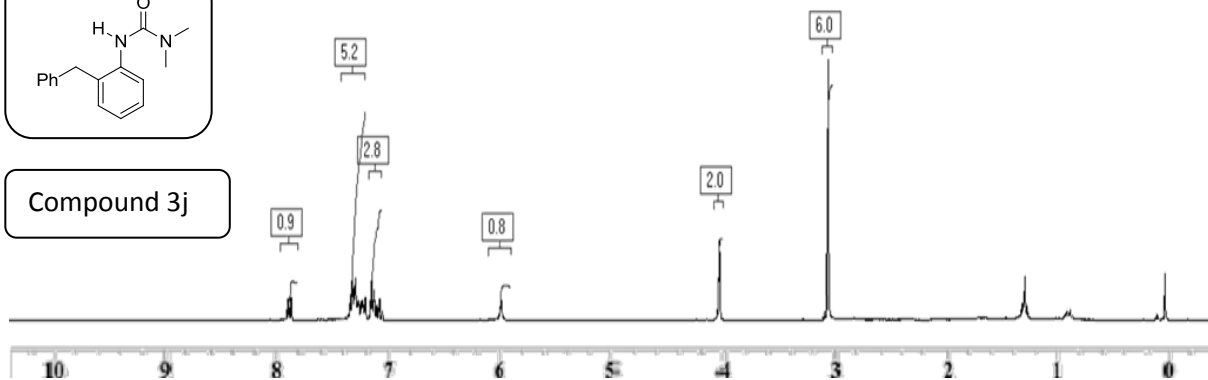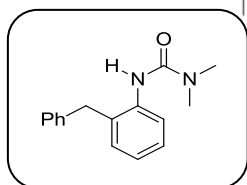

Compound 3j

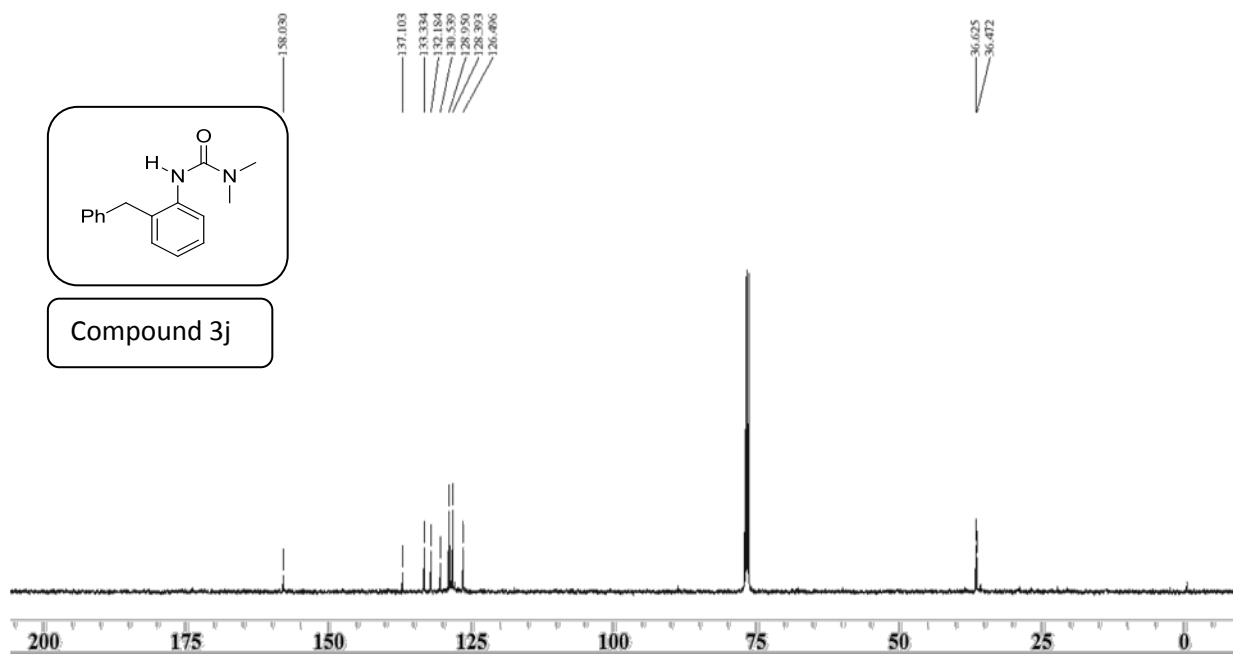



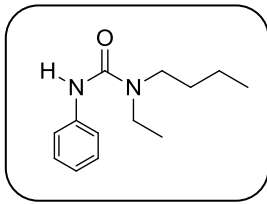

Compound 3k

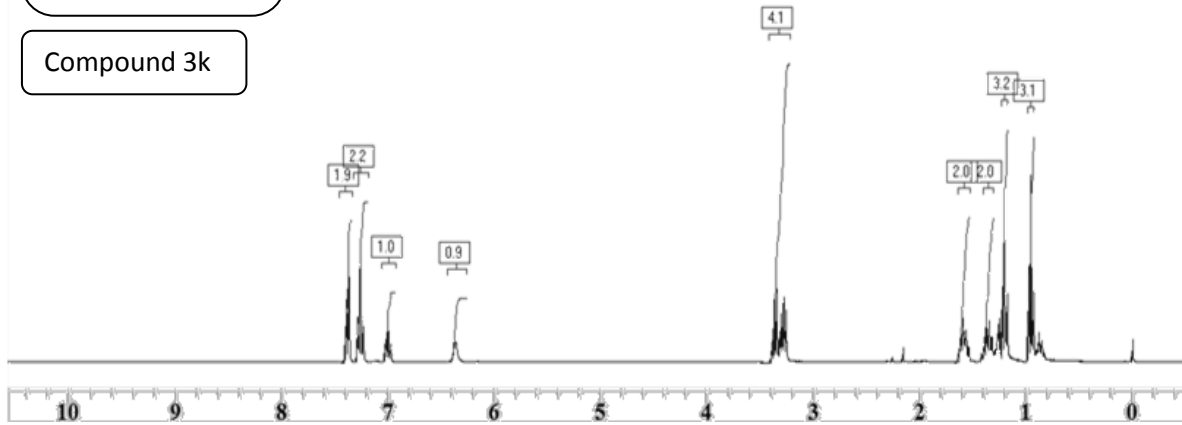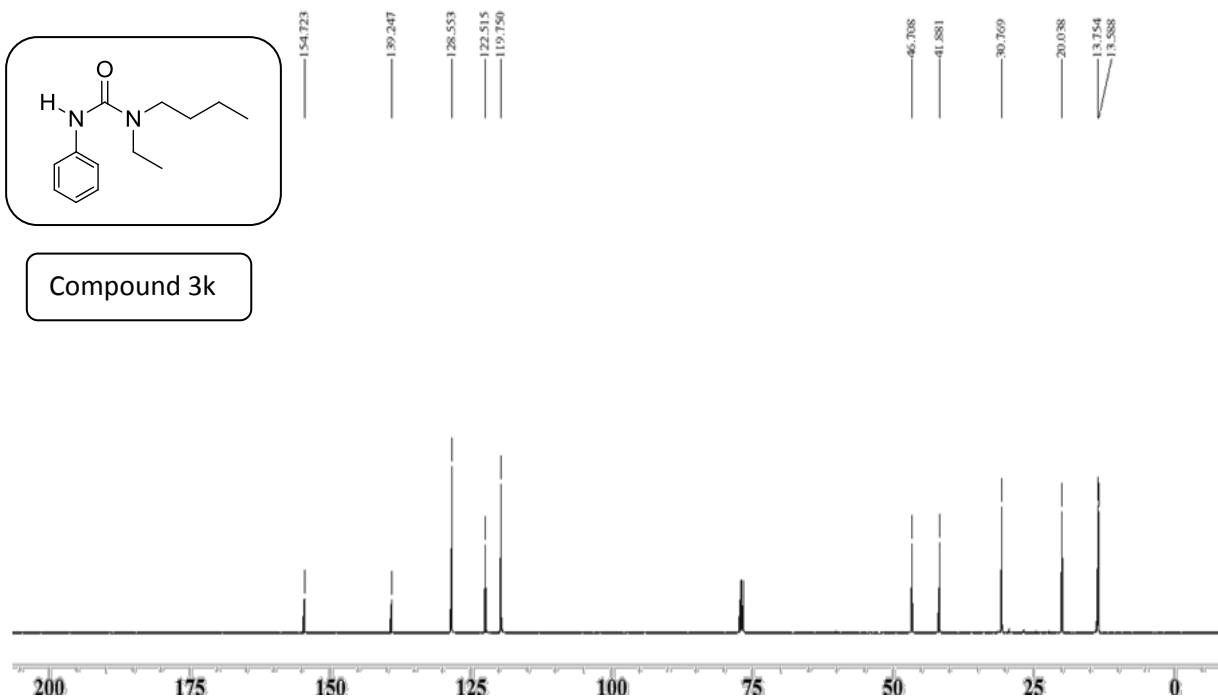

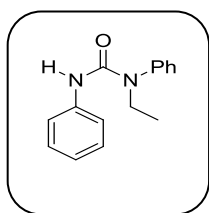

Compound 3I

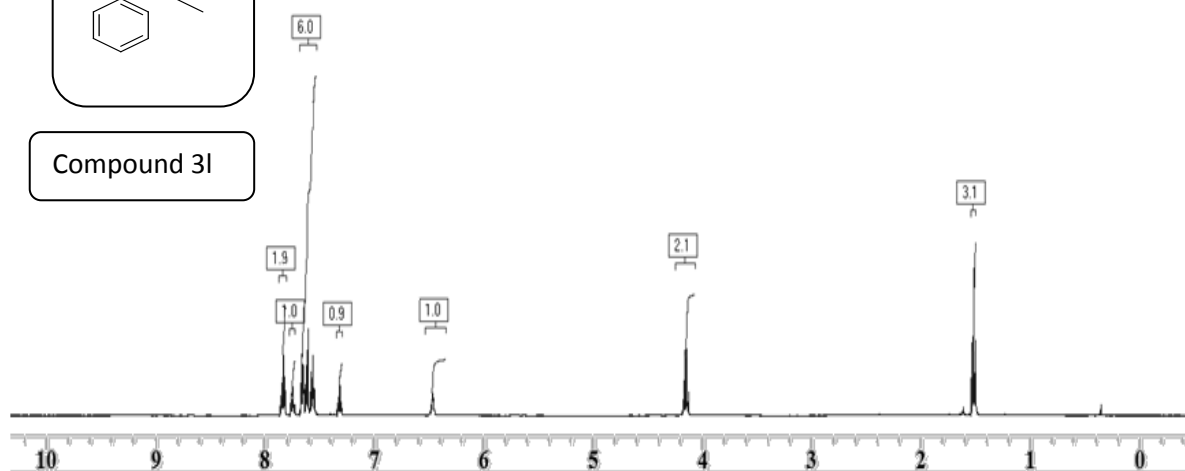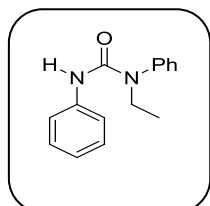

Compound 3I

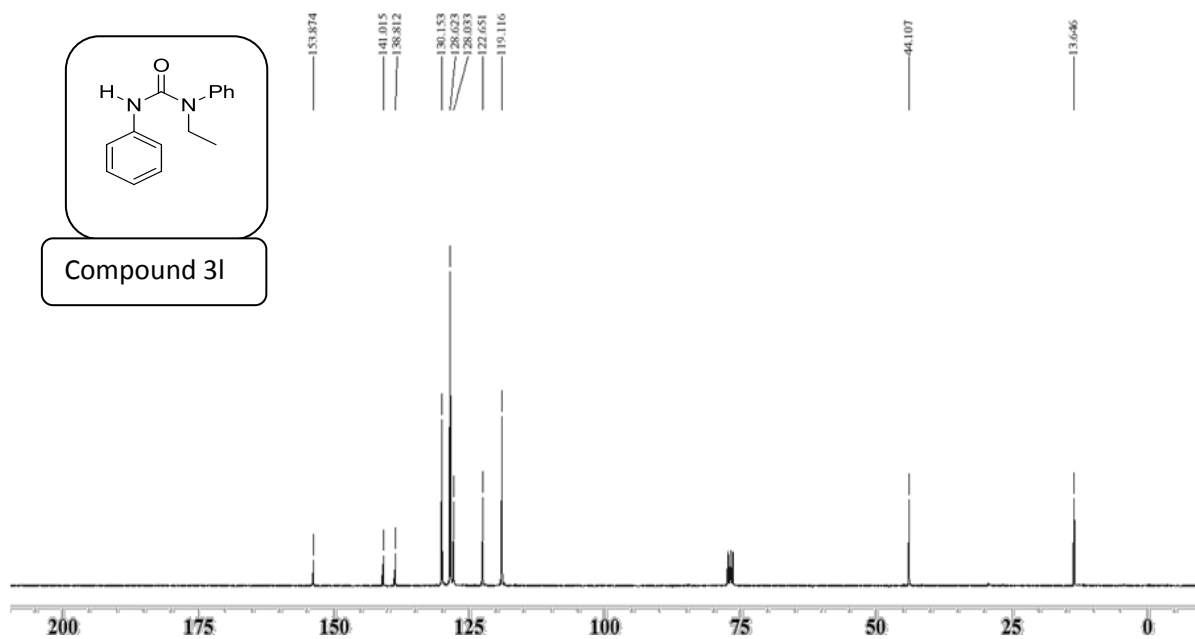

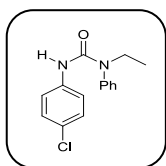

Compound 3m

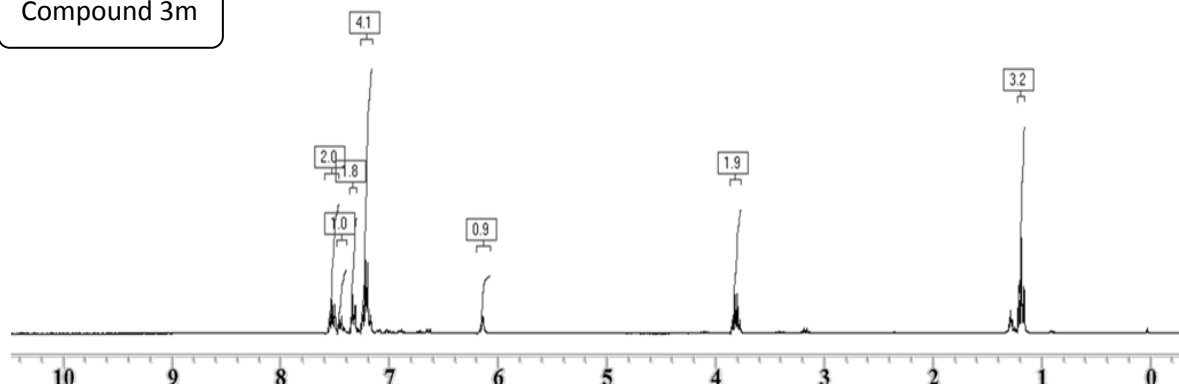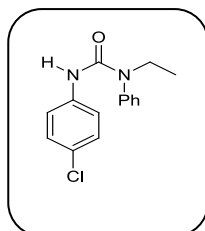

Compound 3m

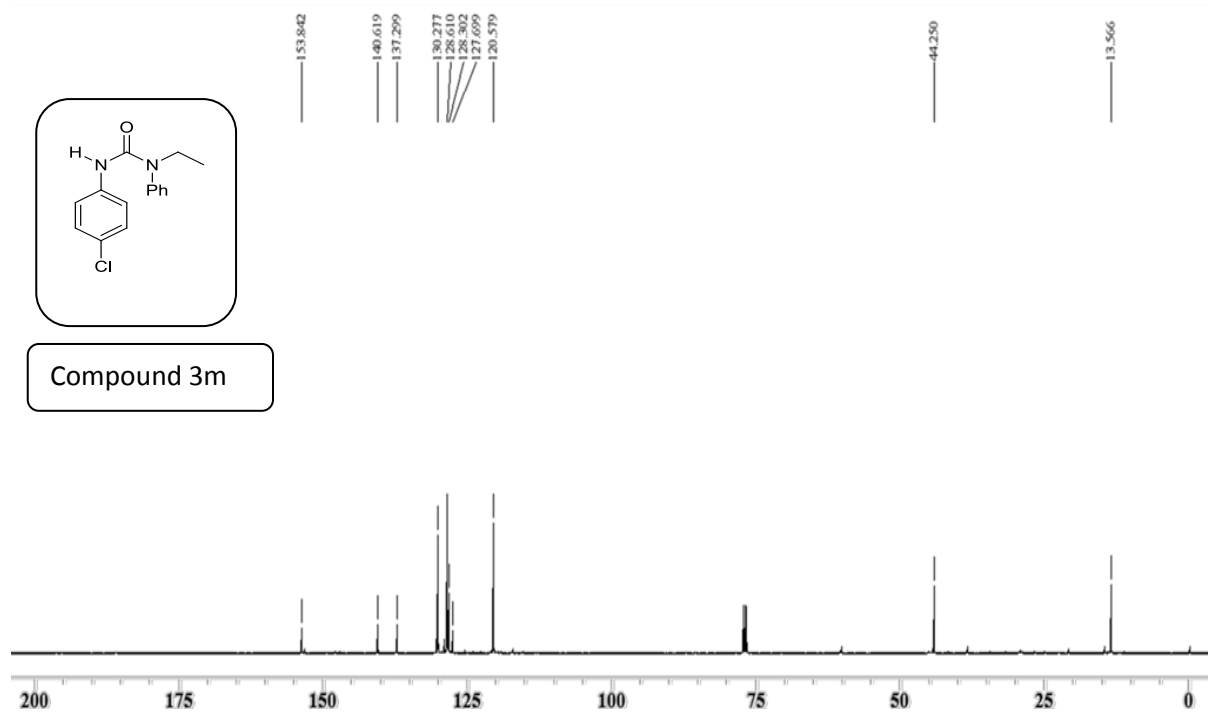

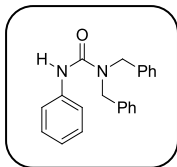

Compound 3n

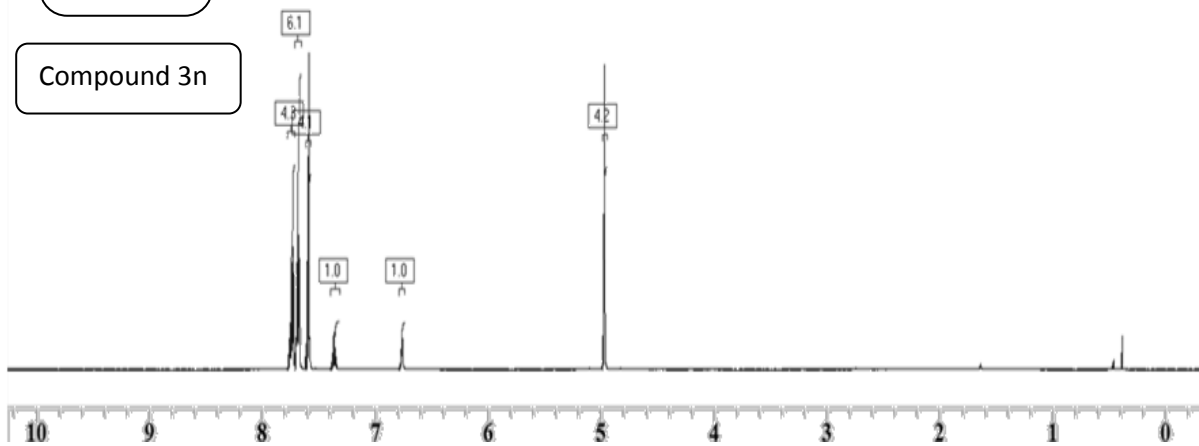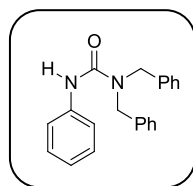

Compound 3n

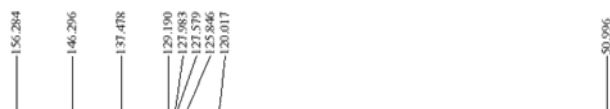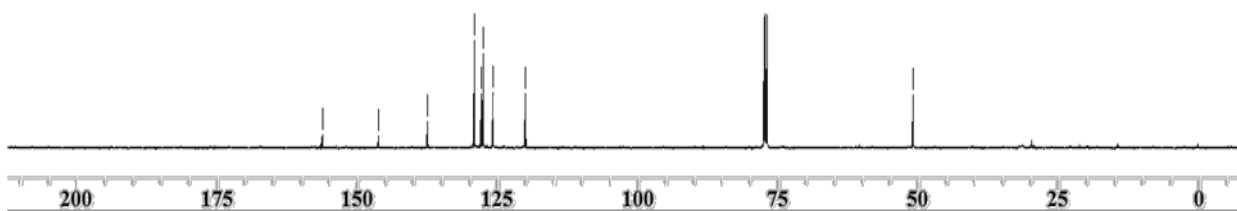

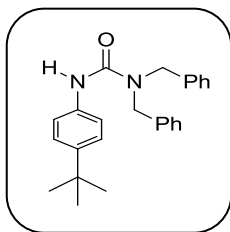

Compound 30

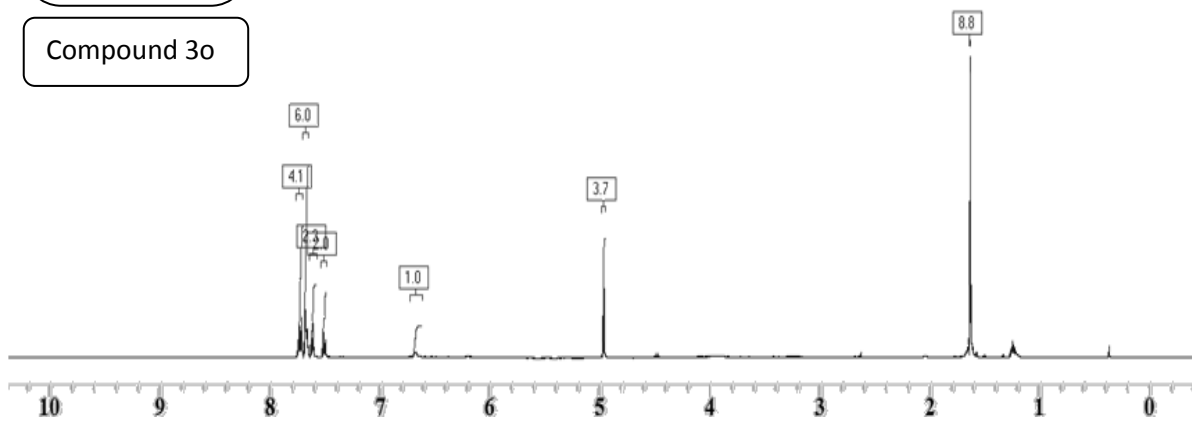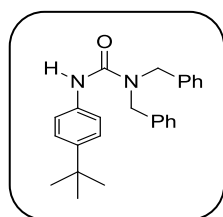

Compound 30

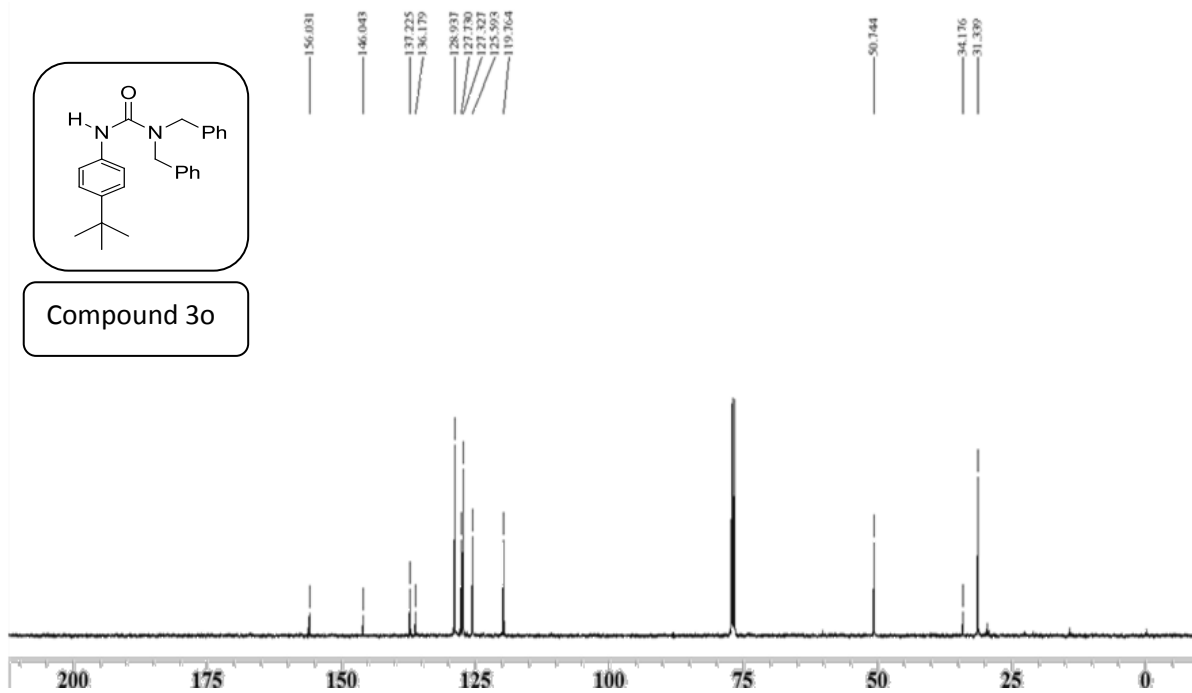

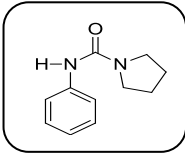

Compound 3p

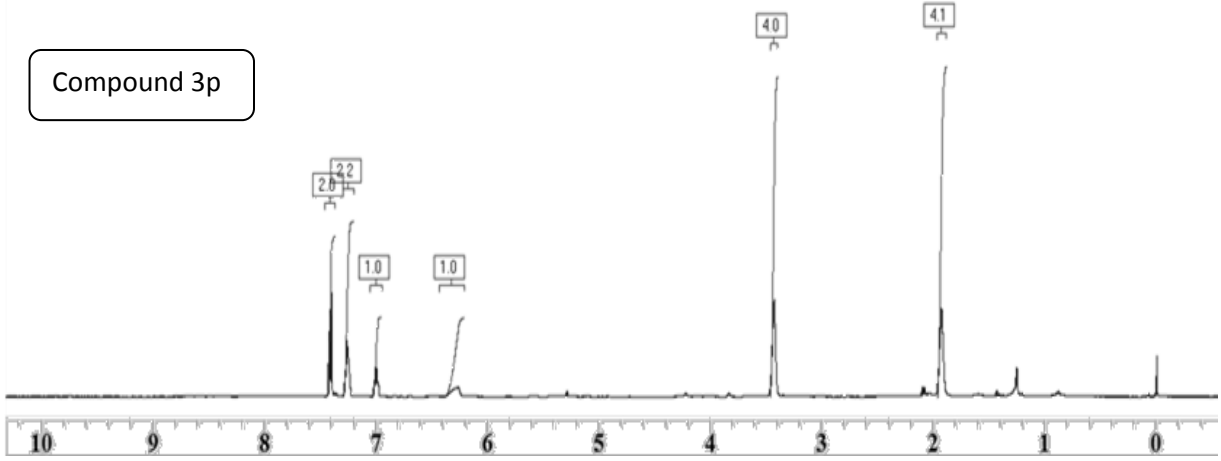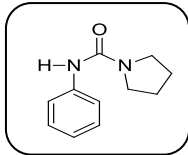

Compound 3p

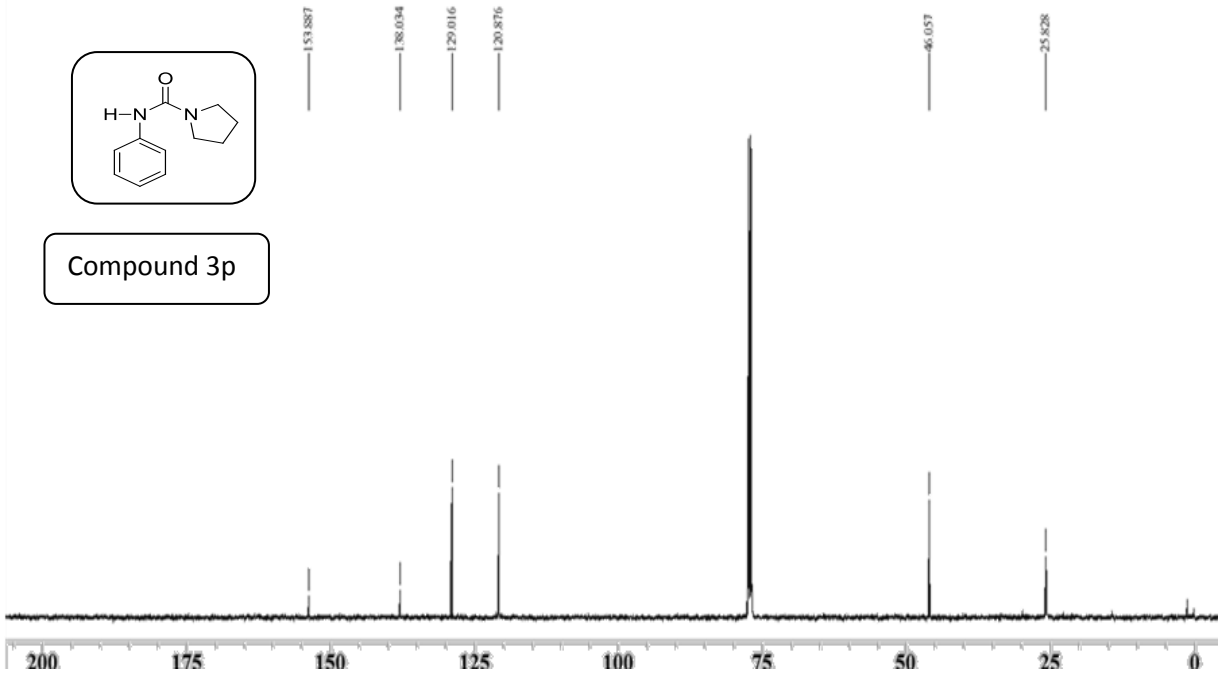

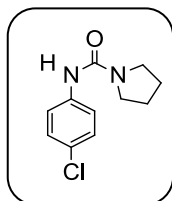

Compound 3q

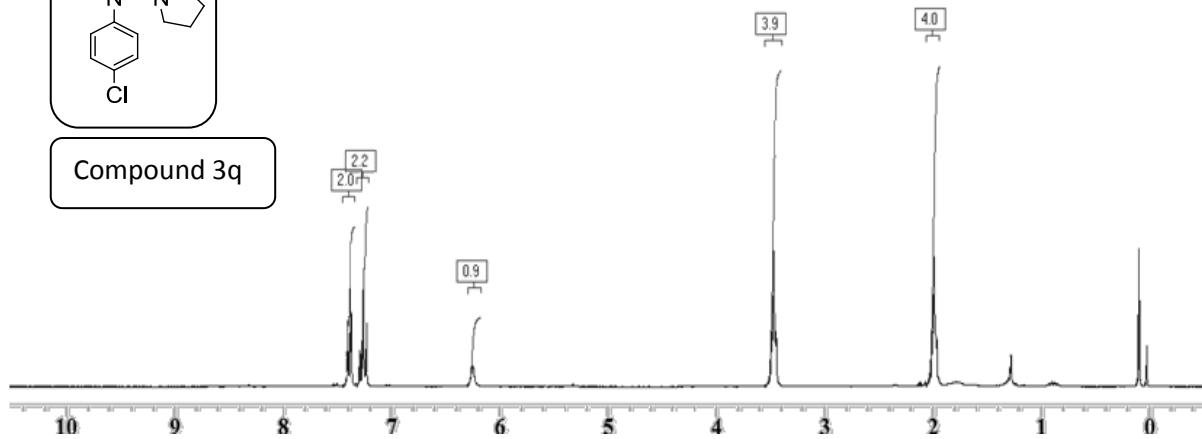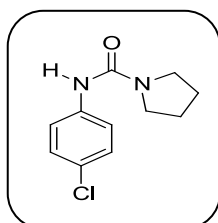

Compound 3q

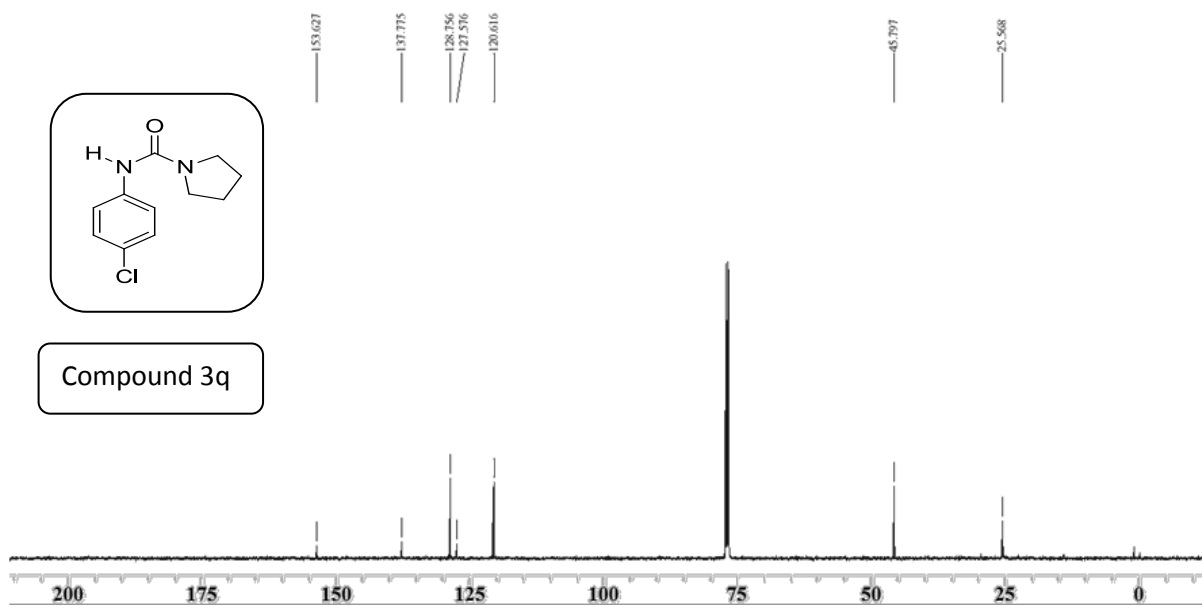

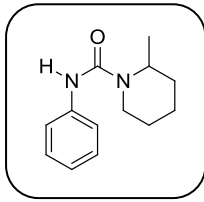

Compound 3r

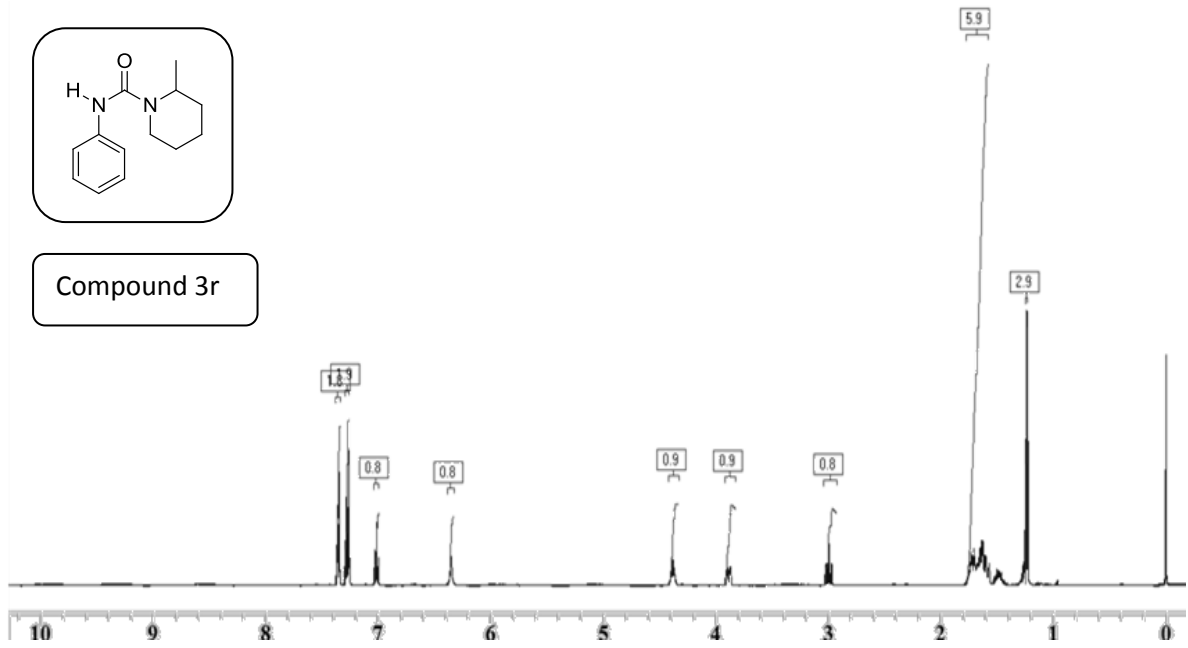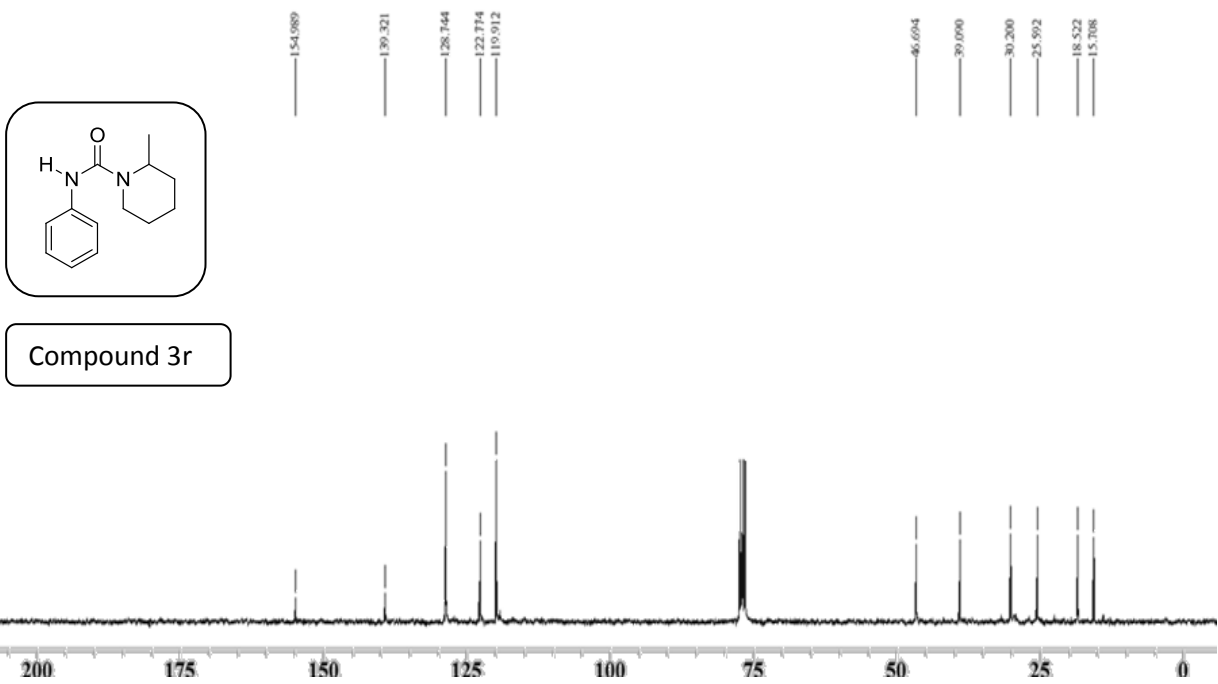



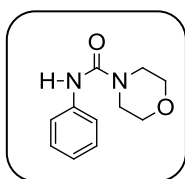

Compound 3s

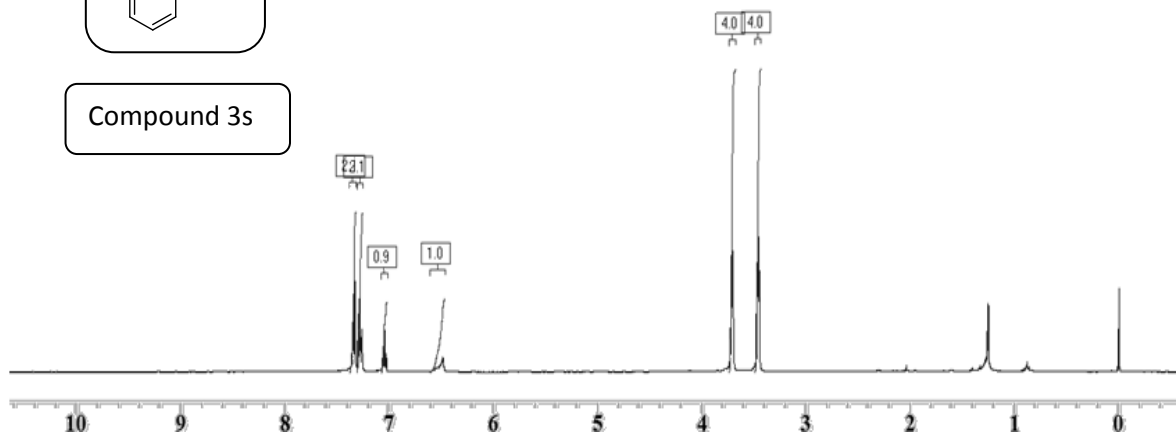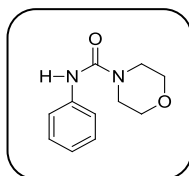

Compound 3s

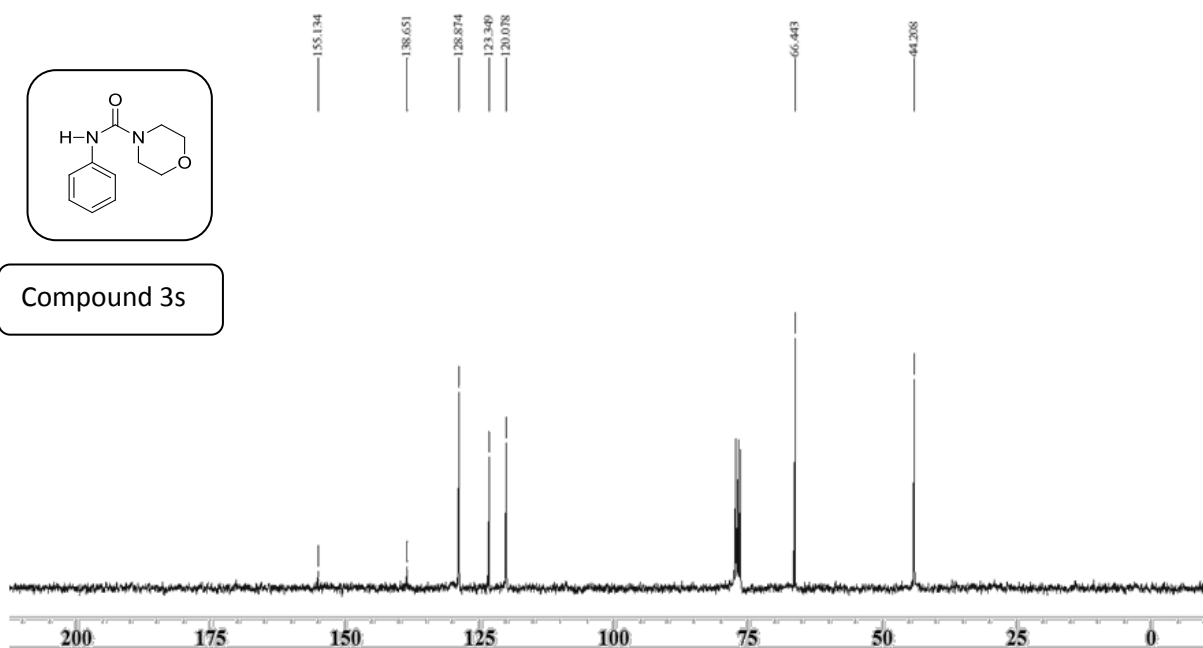

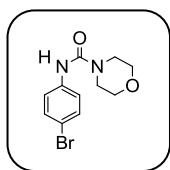

Compound 3t

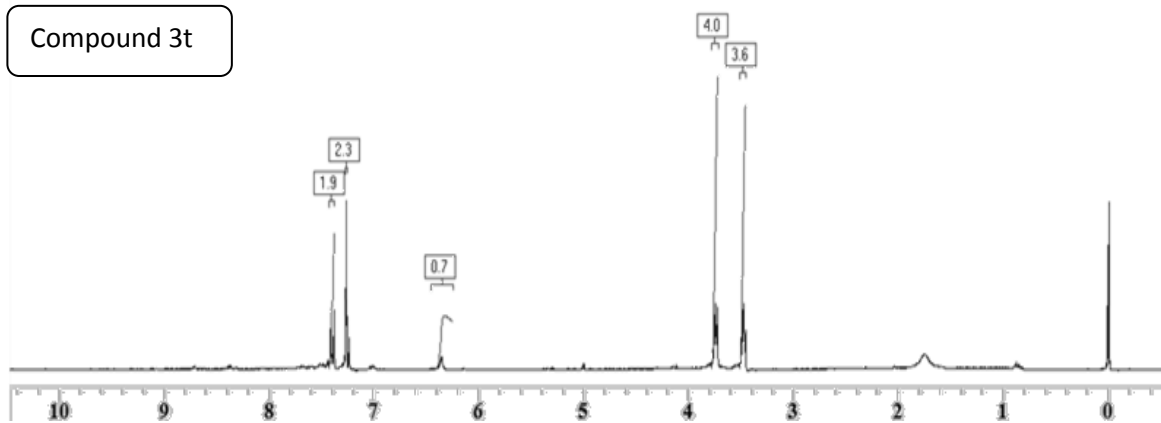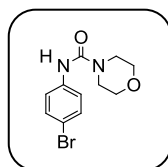

Compound 3t

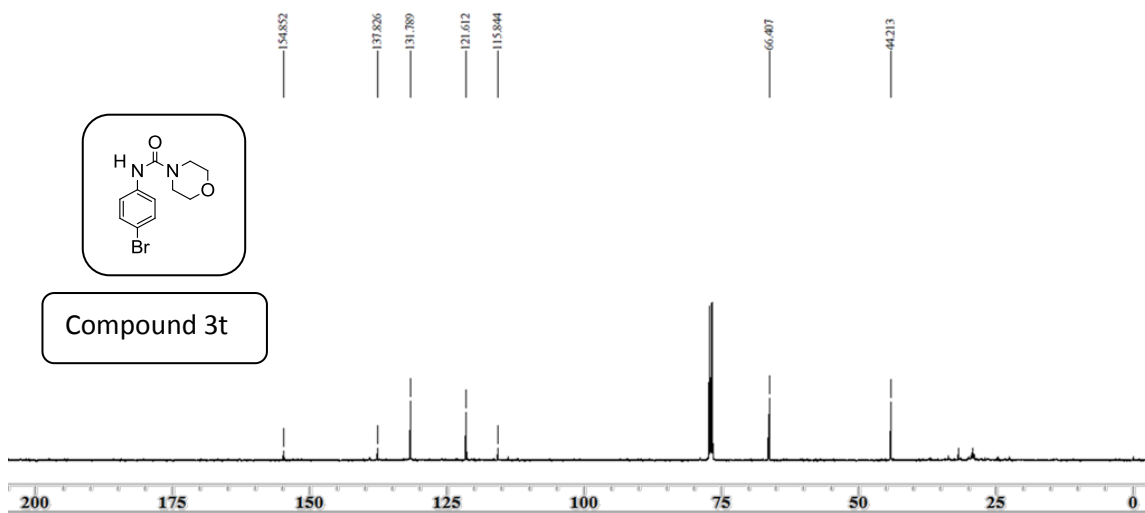

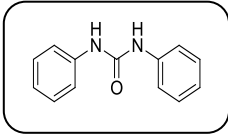

Compound 5a

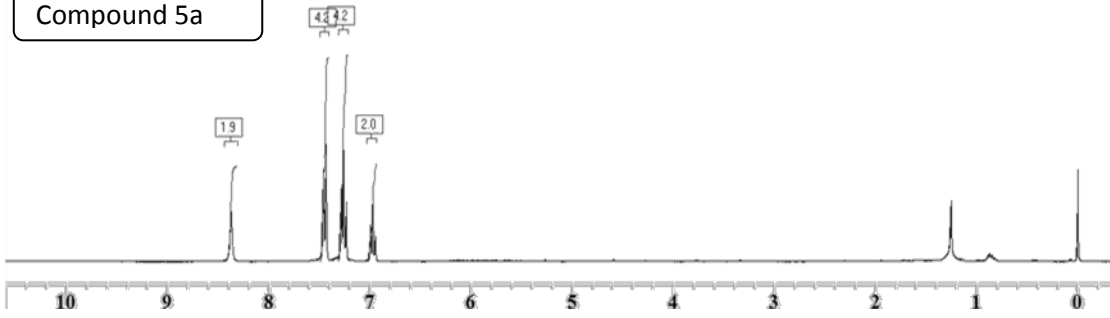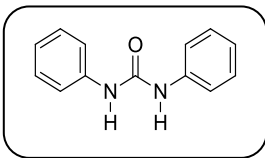

Compound 5a

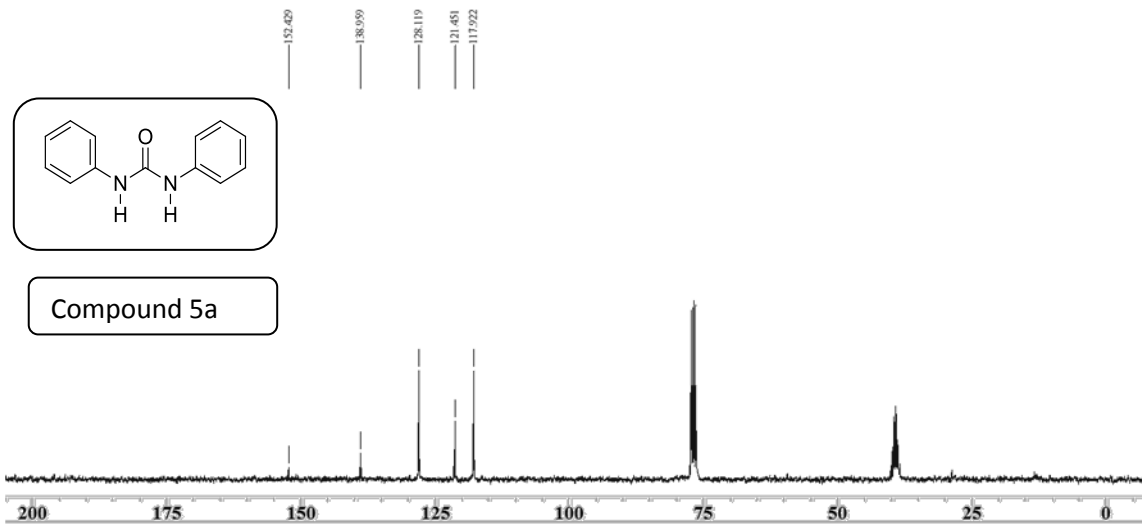

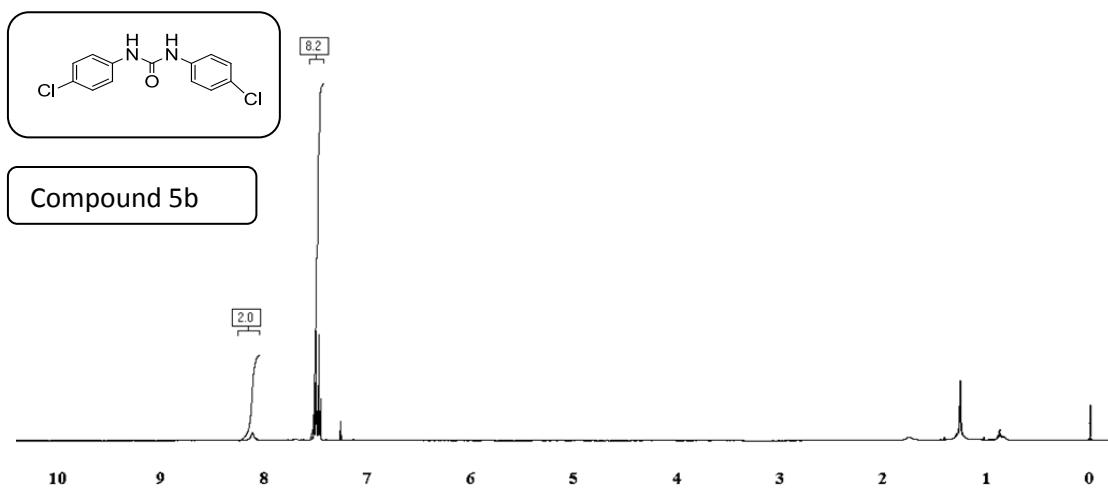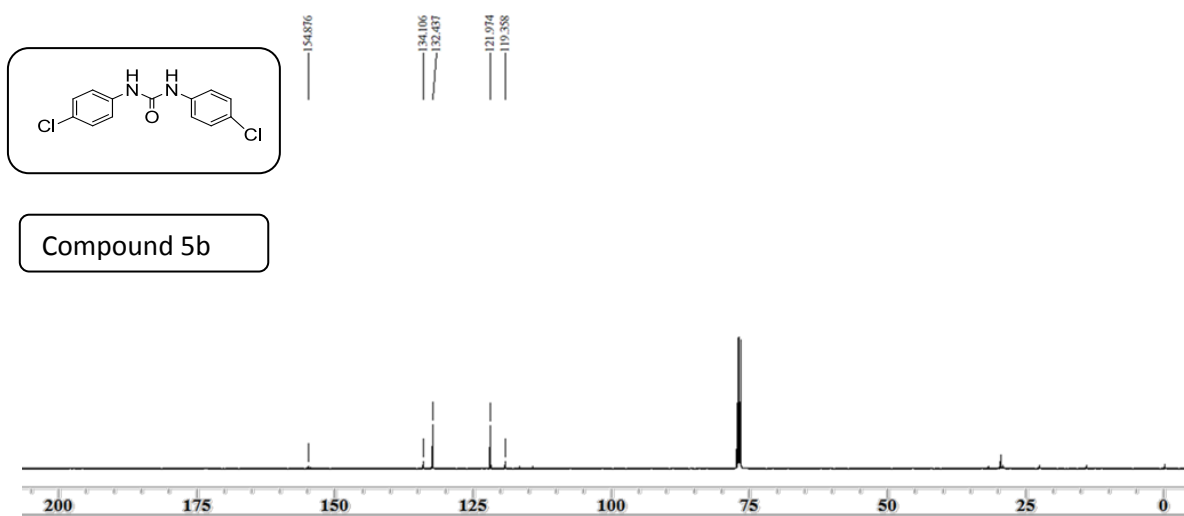

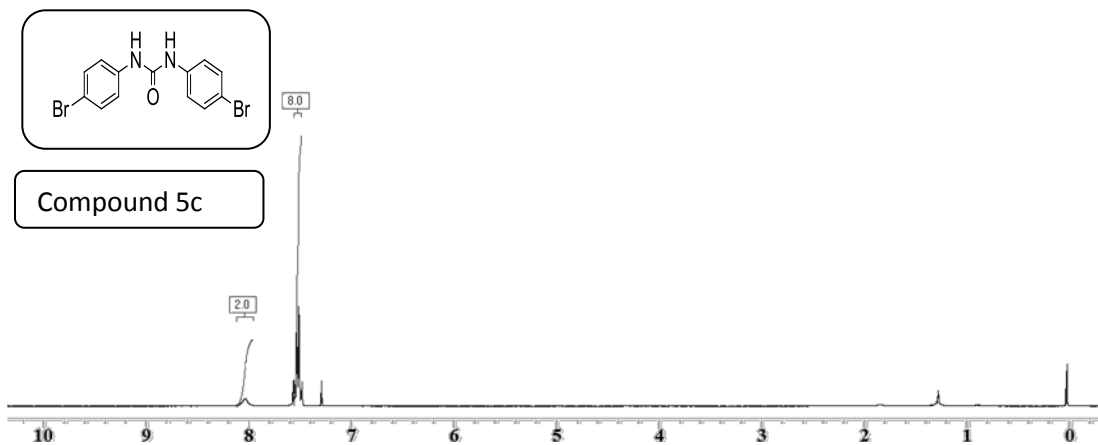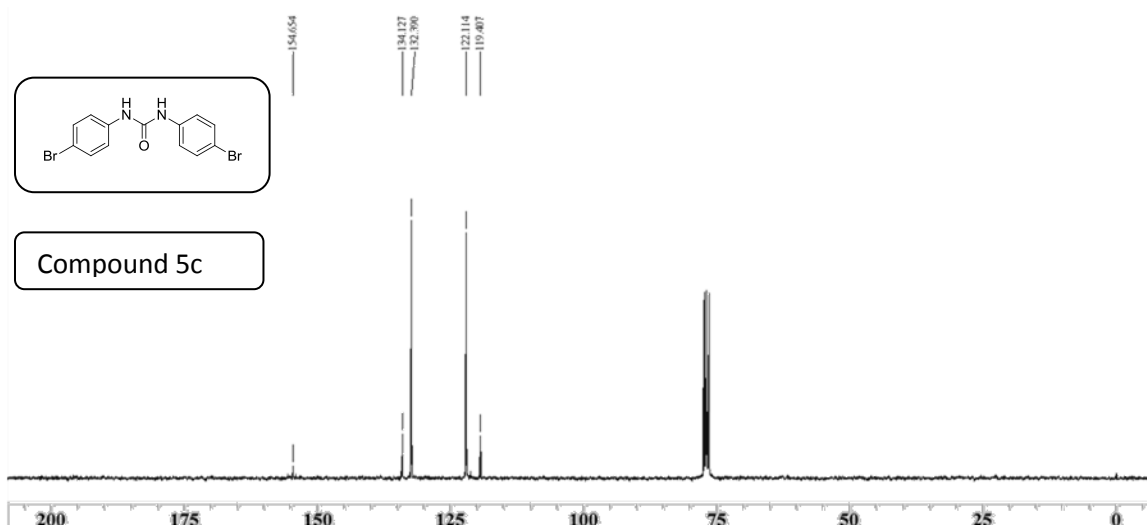

Supplement: c4nj01668h1.pdf [file c4nj01668h1.pdf]
